# Supplementary material for: Post-synthetic modification of zeolitic imidazolate framework-90 via Schiff base reaction for ultrahigh iodine capture
Source: Royal Society of Chemistry journal article supplement (doi:10.1039/d3ta04686a), 2023-01-01
Supplement: d3ta04686a1.pdf [file d3ta04686a1.pdf]

## Electronic Supplementary Information

### Post-synthetic modification of zeolitic imidazolate framework-90 via Schiff base reaction for ultrahigh iodine capture

Zilong Zhang,<sup>†a</sup> Yanchun Chen,<sup>†a</sup> Yiheng Sun,<sup>a</sup> Zilu Chen,<sup>\*a</sup> Zhan-Yun Zhang,<sup>\*a</sup>  
Fupei Liang,<sup>a,b</sup> Dongcheng Liu,<sup>a</sup> and Huan-Cheng Hu<sup>\*a</sup>

*<sup>a</sup>School of Chemistry and Pharmaceutical Sciences, State Key Laboratory for Chemistry and Molecular Engineering of Medicinal Resources, Guangxi Normal University, Guilin, 541004, People's Republic of China.*

*<sup>b</sup>Guangxi Key Laboratory of Electrochemical and Magnetochemical Functional Materials, College of Chemistry and Bioengineering, Guilin University of Technology, Guilin, 541004, People's Republic of China.*

\*Corresponding author

E-mail: zlchen@mailbox.gxnu.edu.cn (Z. Chen); zhang\_zhanyun@126.com (Z.-Y. Zhang); siniantongnian@126.com (H.-C. Hu)

<sup>†</sup> These authors contributed equally to this work.

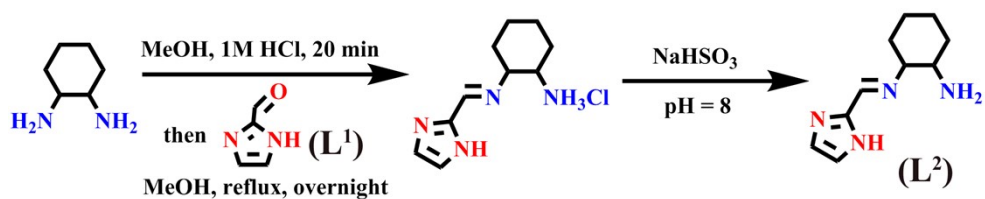

Scheme S1 Synthesis route of mono-Schiff base.

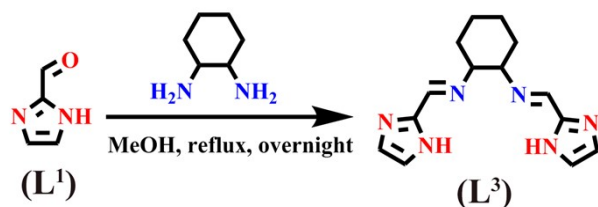

Scheme S2 Synthesis route of bis-Schiff base.

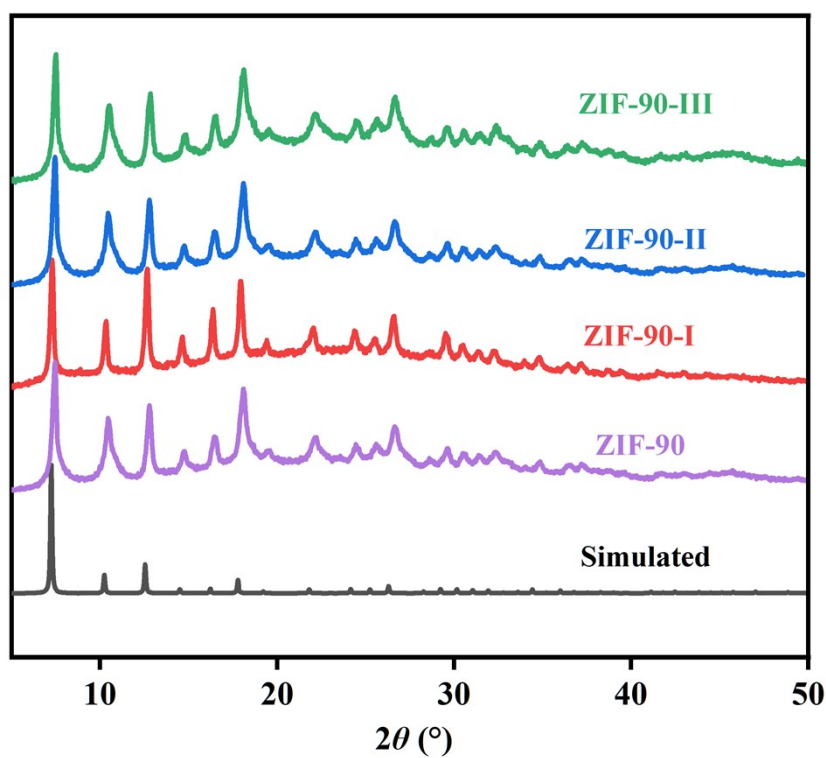

Fig. S1 PXRD patterns of simulated and experimental ZIF-90 and ZIF-90-I-ZIF-90-III.

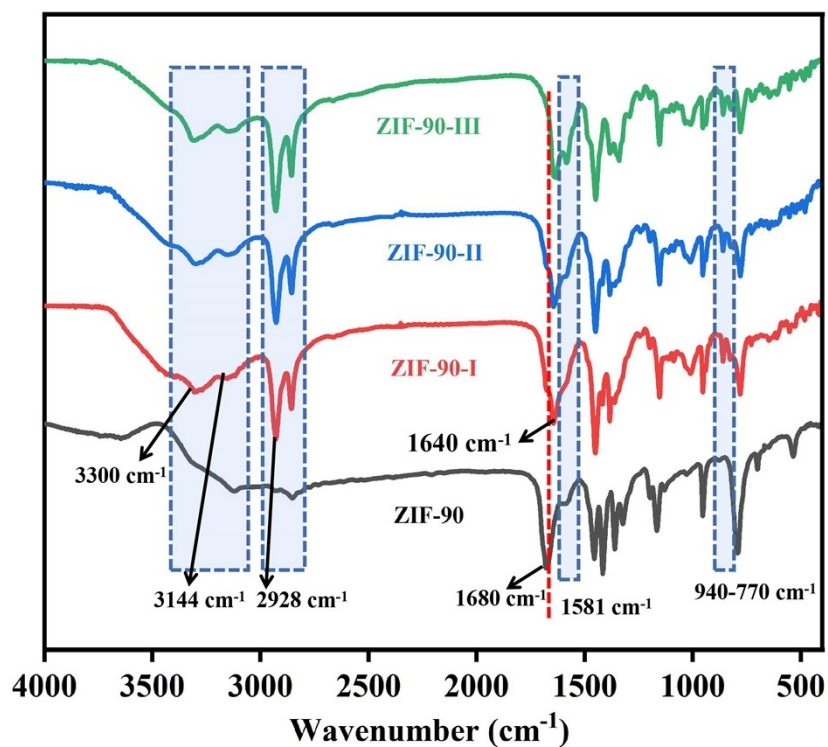

Fig. S2 FTIR spectra of ZIF-90 and ZIF-90-I–ZIF-90-III.

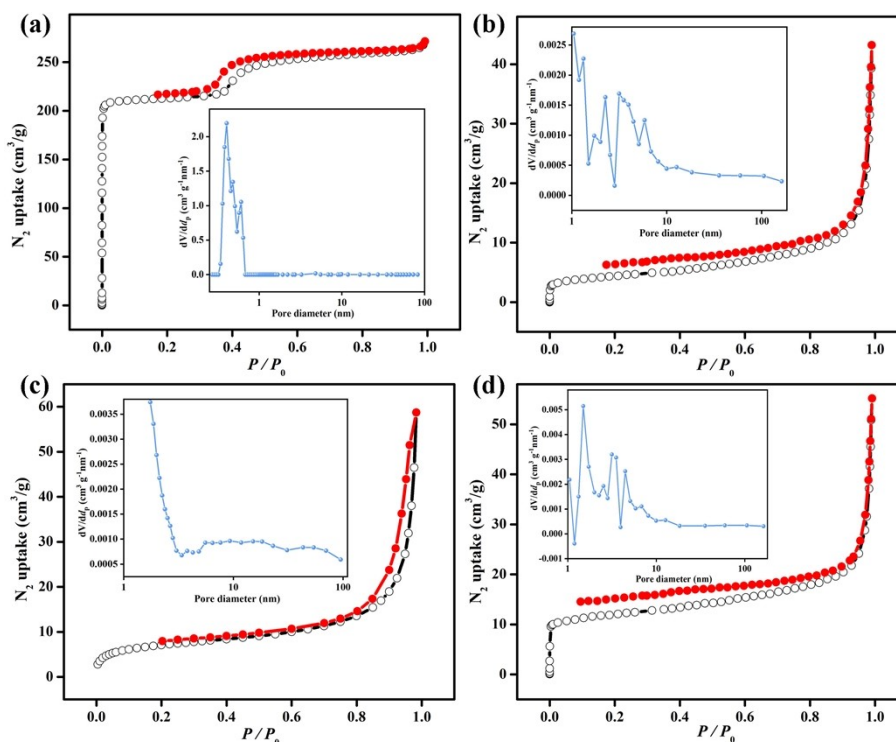

Fig. S3 N<sub>2</sub> adsorption-desorption isotherms for activated samples of (a) ZIF-90, (b) ZIF-90-I (c) ZIF-90-II and (d) ZIF-90-III measured at 77 K. Enlargement: Pore size distributions of ZIF-90 and ZIF-90-I–ZIF-90-III.

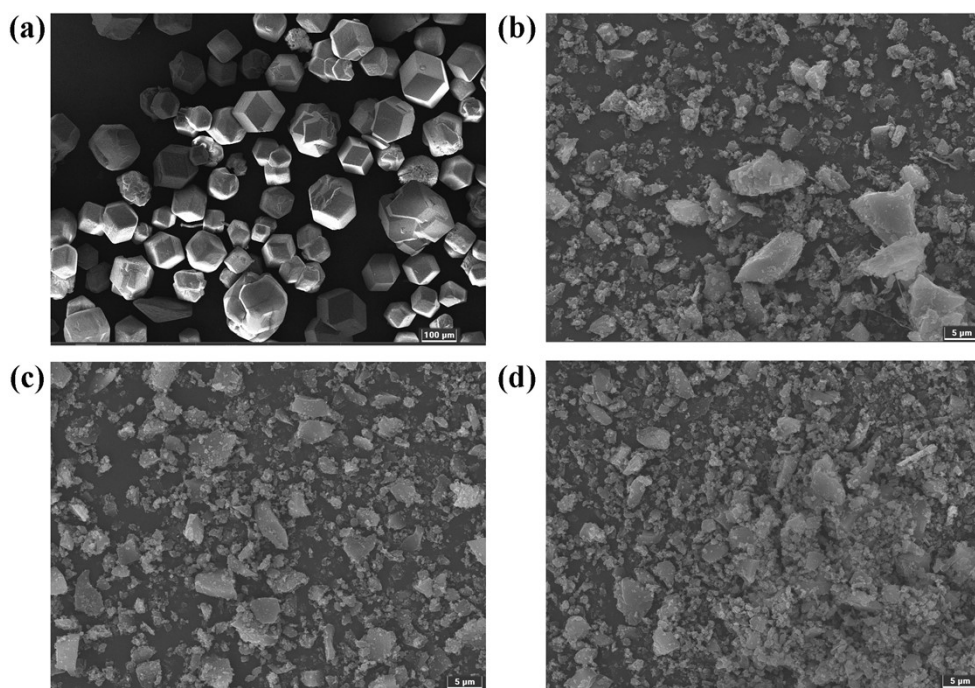

**Fig. S4** SEM images of (a) ZIF-90, (b) ZIF-90-I, (c) ZIF-90-II and (d) ZIF-90-III.

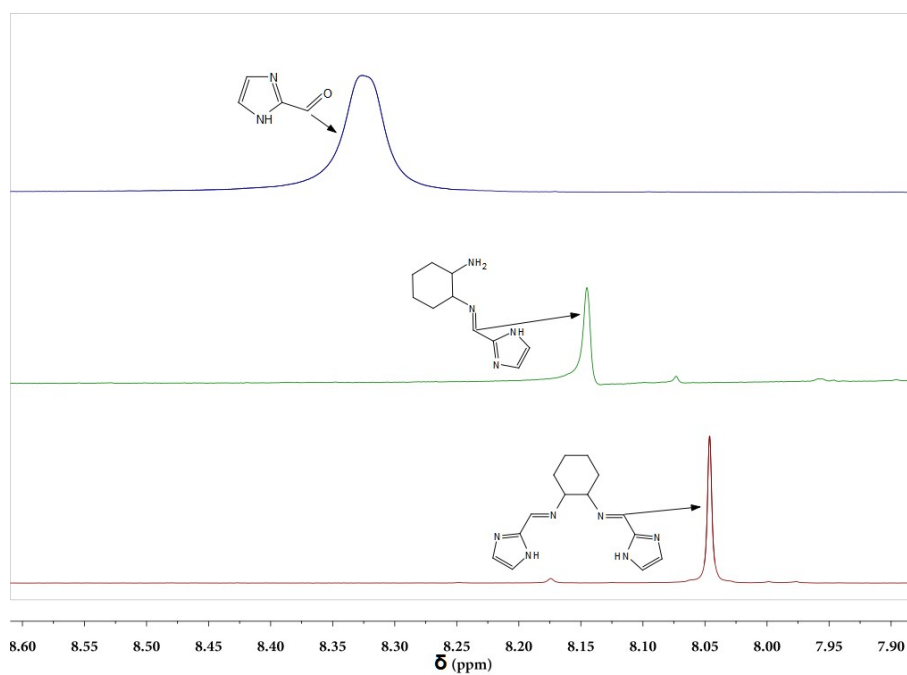

**Fig. S5**  $^1\text{H}$  NMR of  $\text{L}^1$ ,  $\text{L}^2$  and  $\text{L}^3$ .

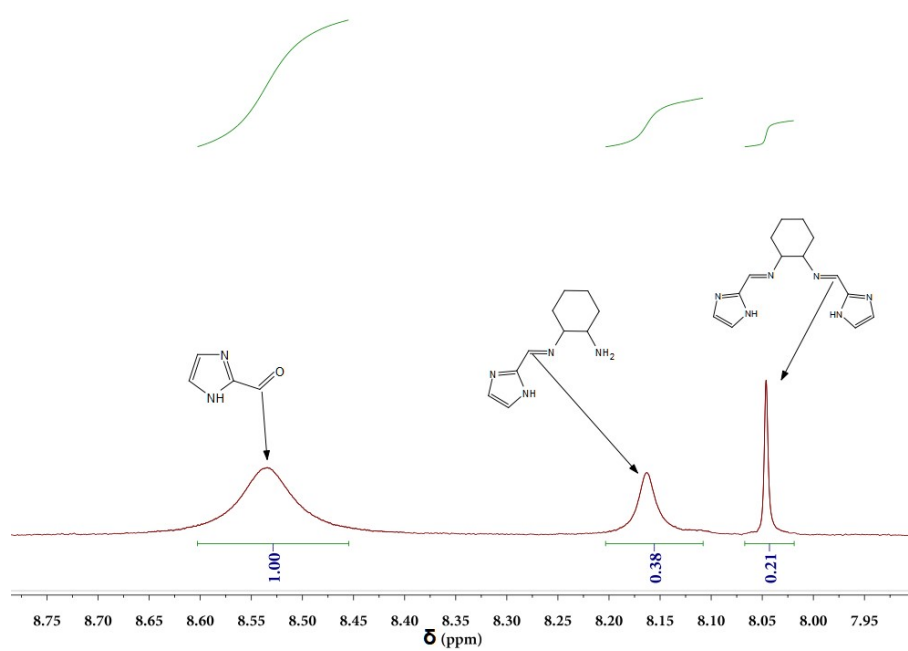

**Fig. S6**  $^1\text{H}$  NMR of digested ZIF-90-I.

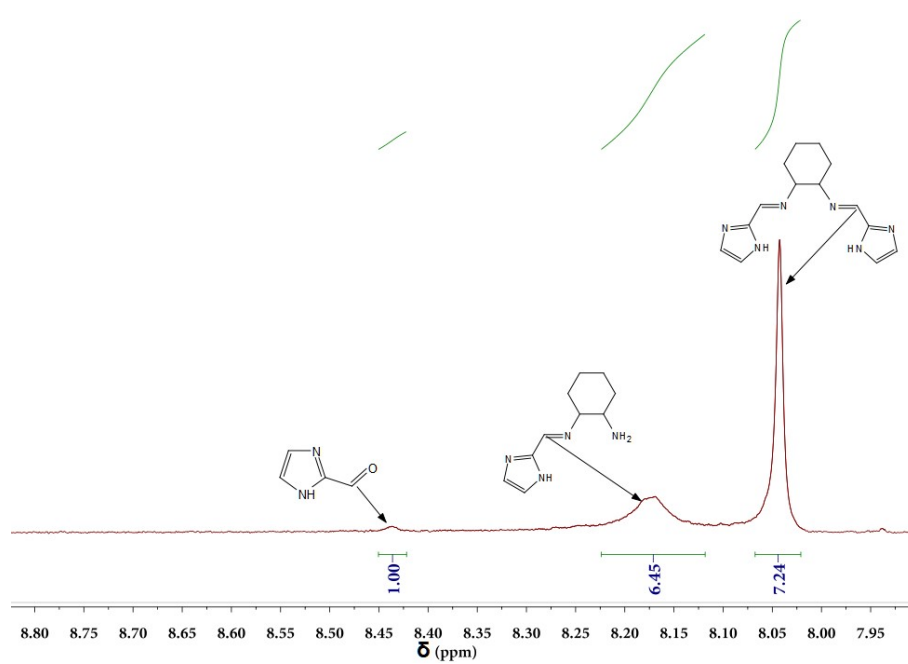

**Fig. S7**  $^1\text{H}$  NMR of digested ZIF-90-II.

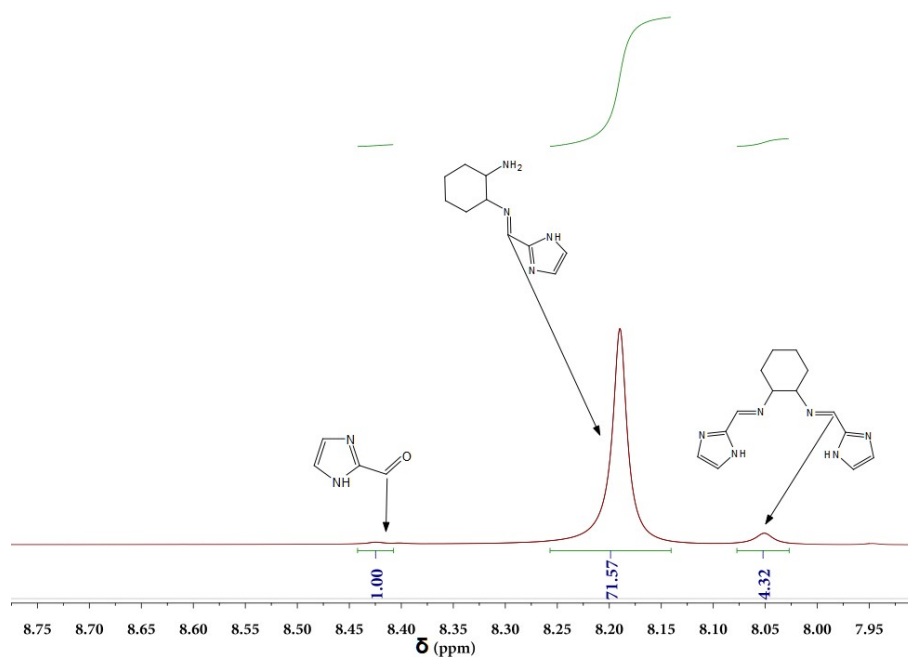

Fig. S8  $^1\text{H}$  NMR of digested ZIF-90-III.

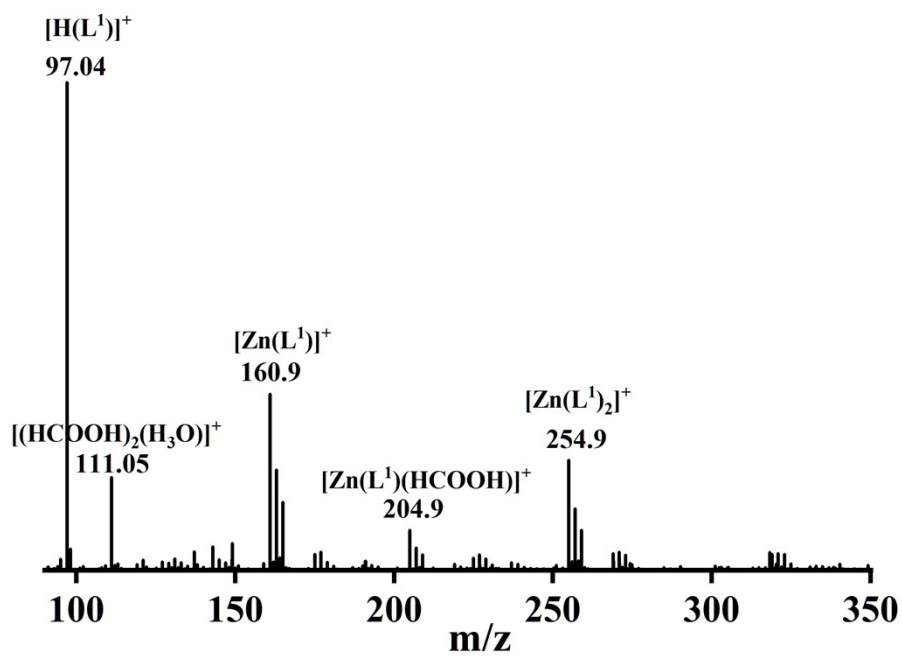

Fig. S9 HRESI-MS of digested ZIF-90.

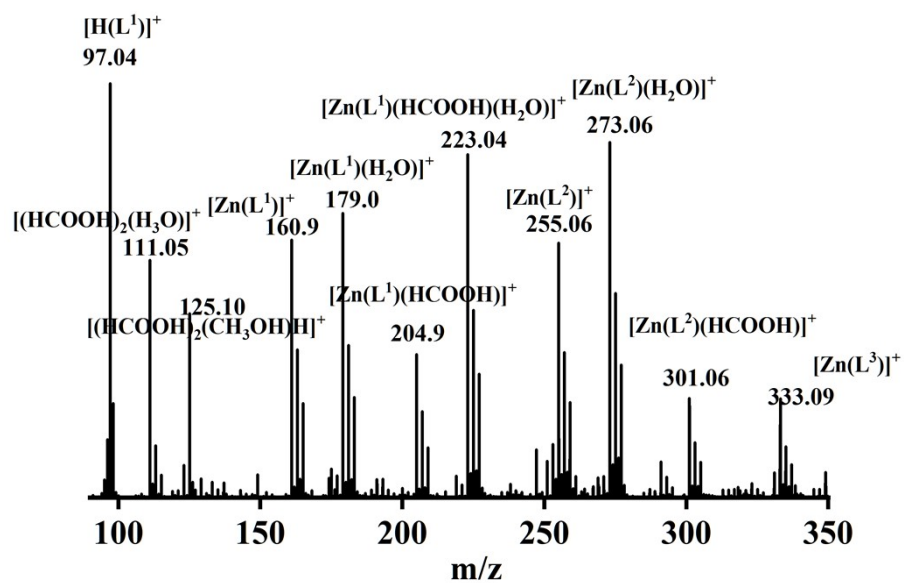

Fig. S10 HRESI-MS of digested ZIF-90-I.

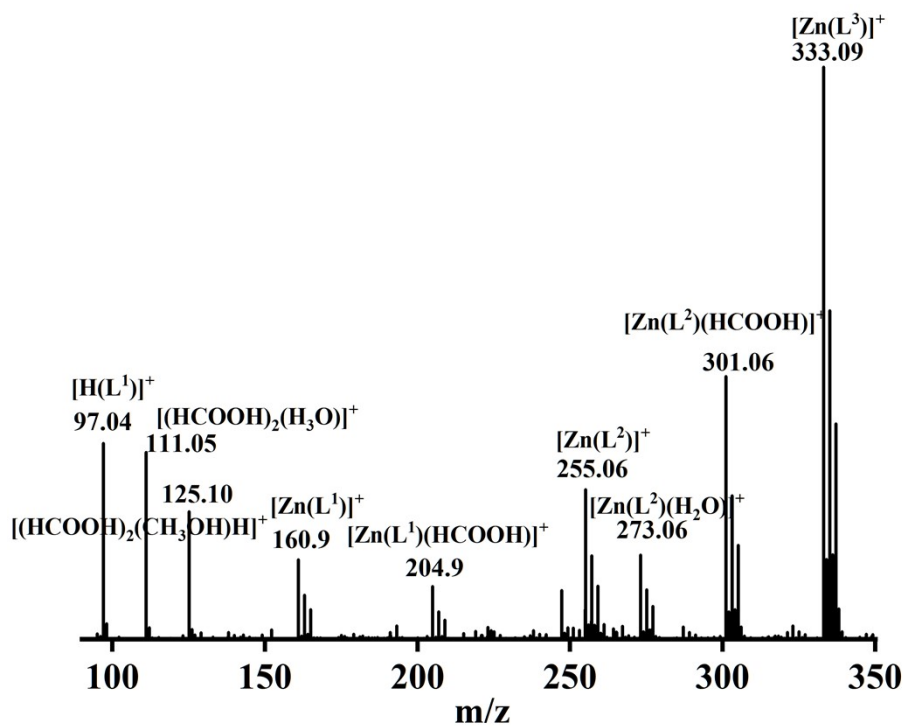

Fig. S11 HRESI-MS of digested ZIF-90-II.

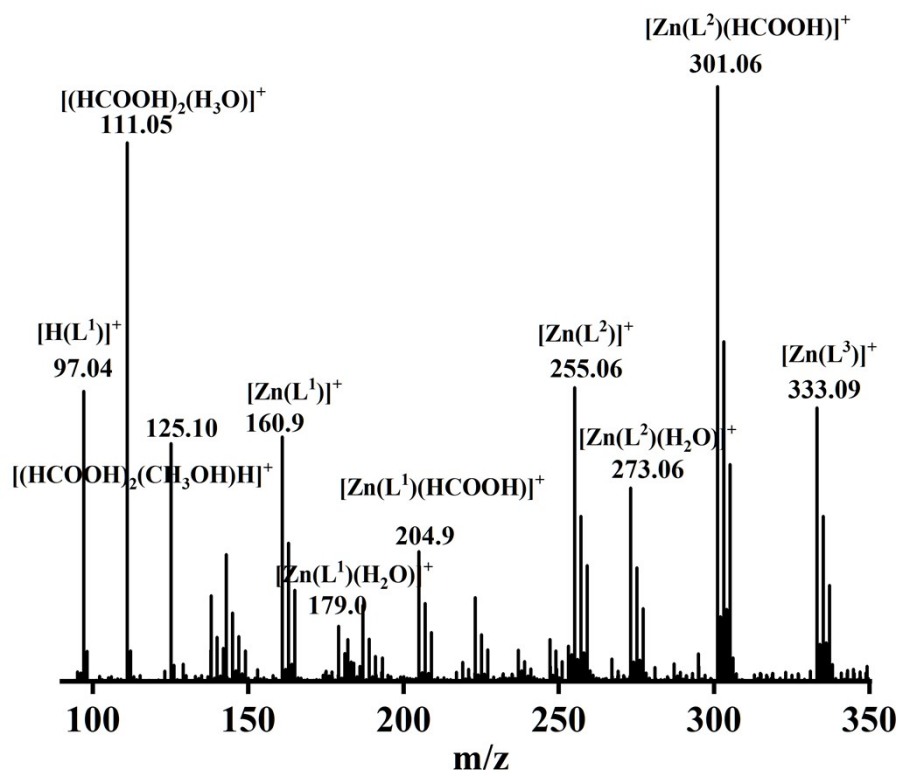

Fig. S12 HRESI-MS of digested ZIF-90-III.



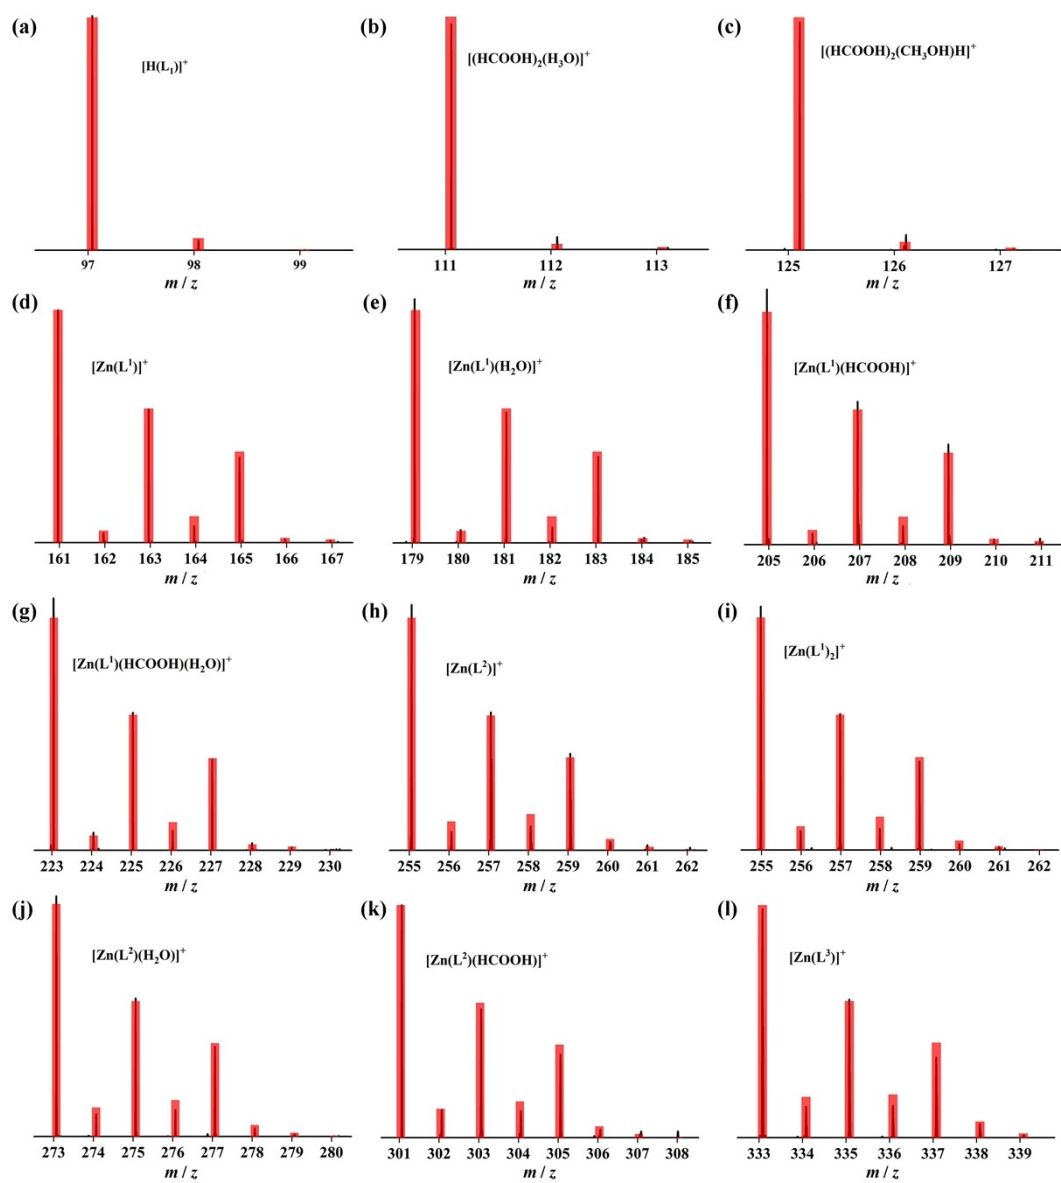

**Fig. S13** The superposed simulated and observed HRESI-MS spectra of major species for digested ZIF-90-I–ZIF-90-III.

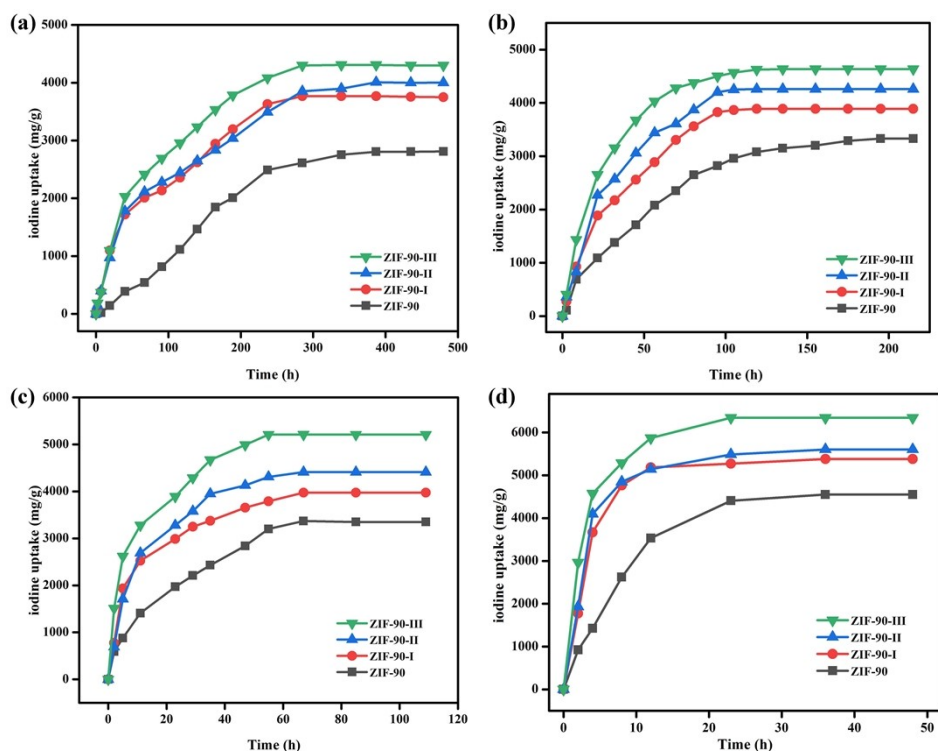

**Fig. S14** Iodine adsorption isotherms of ZIF-90 and ZIF-90-I–ZIF-90-III at (a) 40, (b) 50, (c) 60 and (d) 90 °C under ambient pressure.

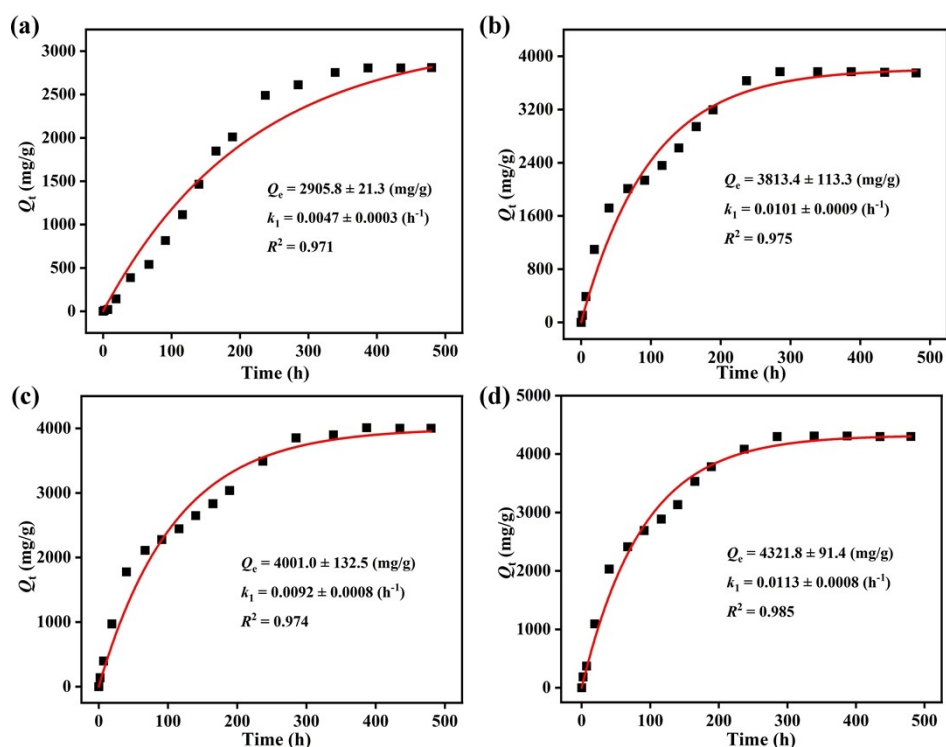

**Fig. S15** The pseudo-first kinetic models for iodine vapour adsorption kinetics of (a) ZIF-90, (b) ZIF-90-I, (c) ZIF-90-II and (d) ZIF-90-III at 40 °C under ambient pressure.

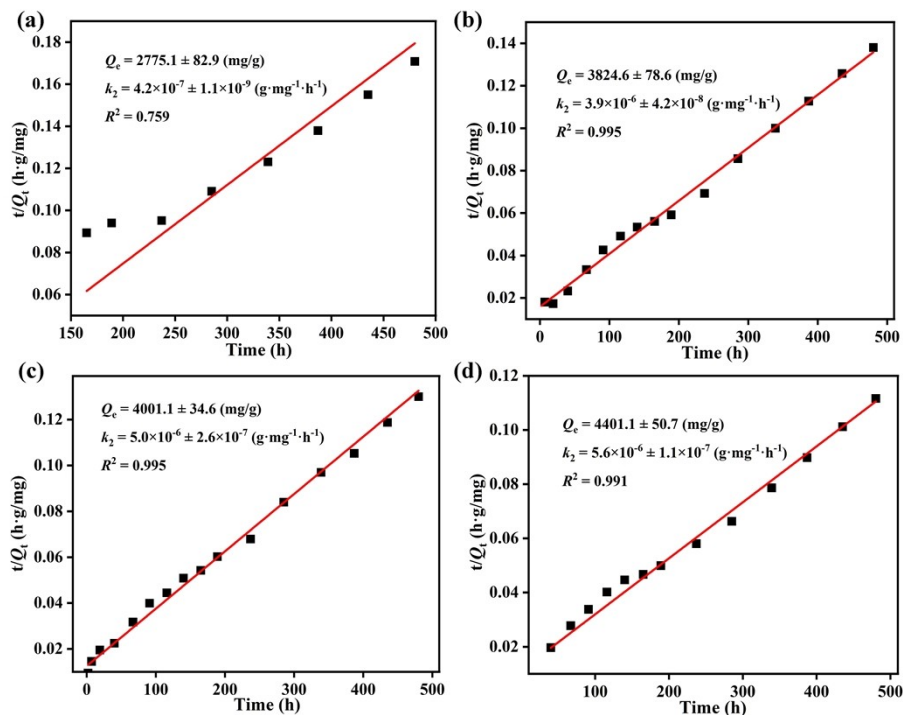

**Fig. S16** The pseudo-second kinetic models for iodine vapour adsorption kinetics of (a) ZIF-90, (b) ZIF-90-I, (c) ZIF-90-II and (d) ZIF-90-III at 40 °C under ambient pressure.

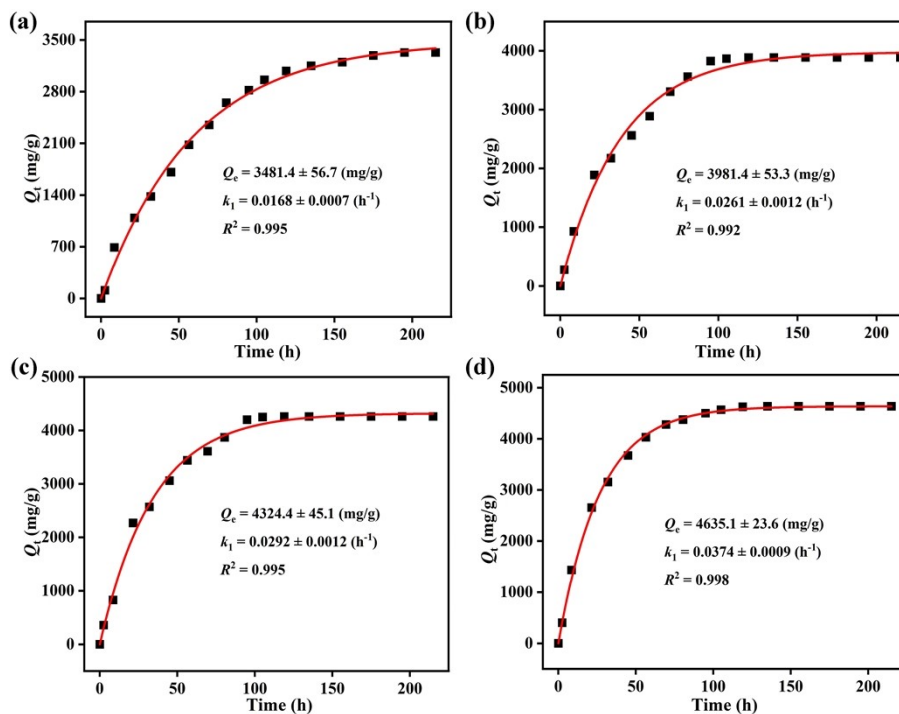

**Fig. S17** The pseudo-first kinetic models for iodine vapour adsorption kinetics of (a) ZIF-90, (b) ZIF-90-I, (c) ZIF-90-II and (d) ZIF-90-III at 50 °C under ambient pressure.

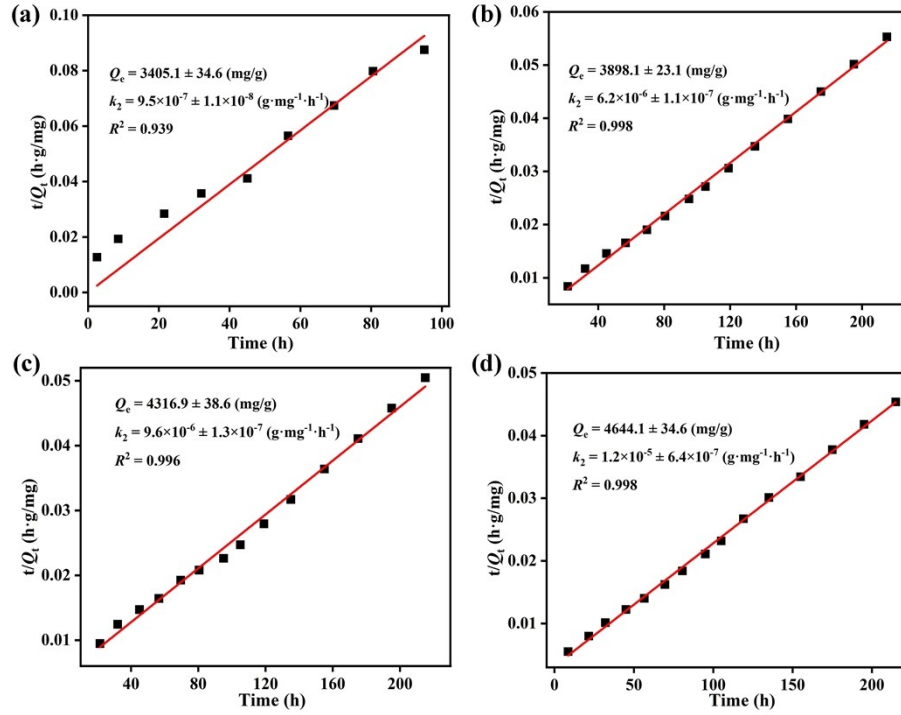

**Fig. S18** The pseudo-second kinetic models for iodine vapour adsorption kinetics of (a) ZIF-90, (b) ZIF-90-I, (c) ZIF-90-II and (d) ZIF-90-III at 50 °C under ambient pressure.

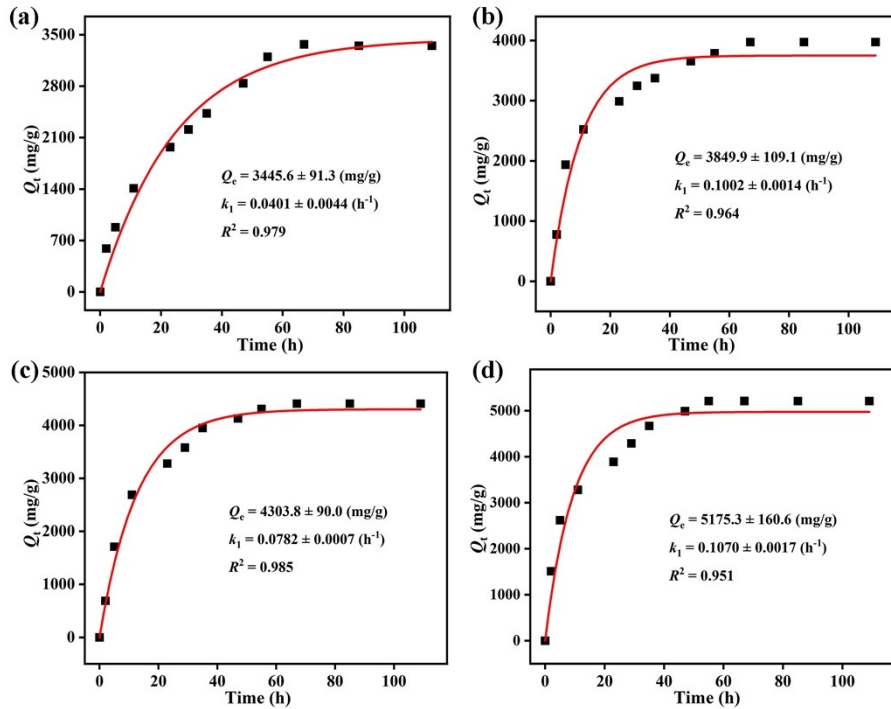

**Fig. S19** The pseudo-first kinetic models for iodine vapour adsorption kinetics of (a) ZIF-90, (b) ZIF-90-I, (c) ZIF-90-II and (d) ZIF-90-III at 60 °C under ambient pressure.

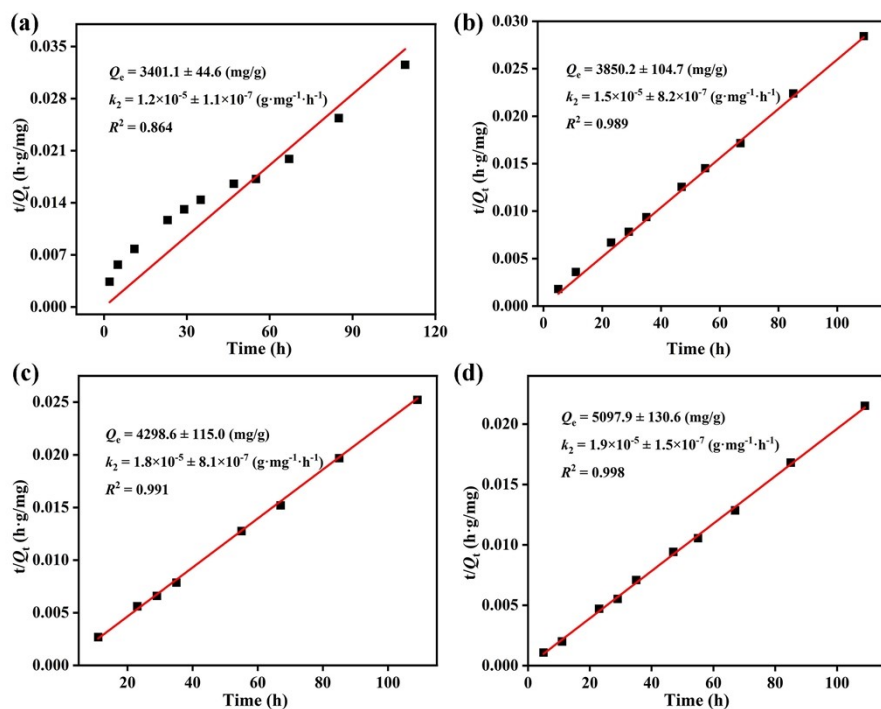

**Fig. S20** The pseudo-second kinetic models for iodine vapour adsorption kinetics of (a) ZIF-90, (b) ZIF-90-I, (c) ZIF-90-II and (d) ZIF-90-III at 60 °C under ambient pressure.

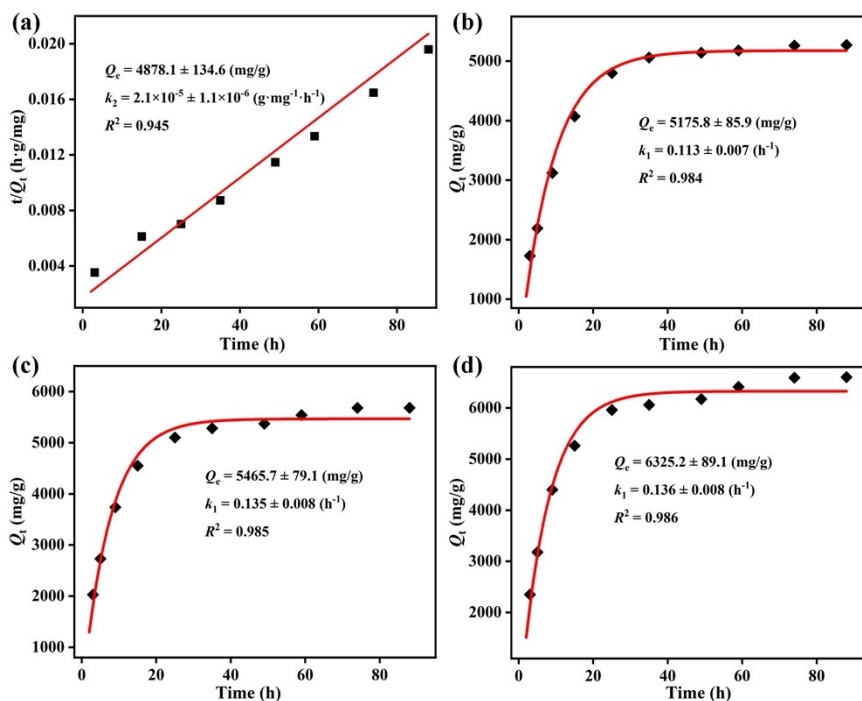

**Fig. S21** The pseudo-second kinetic models for iodine vapor adsorption kinetics of (a) ZIF-90, the pseudo-first kinetic models for iodine vapor adsorption kinetics of (b) ZIF-90-I, (c) ZIF-90-II and (d) ZIF-90-III at 75 °C under ambient pressure.

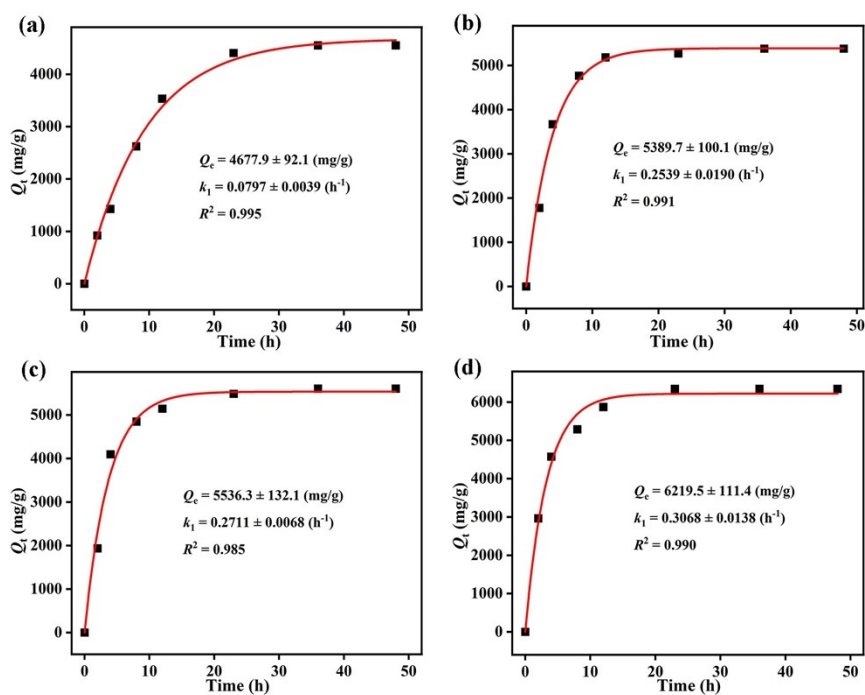

**Fig. S22** The pseudo-first kinetic models for iodine vapour adsorption kinetics of (a) ZIF-90, (b) ZIF-90-I, (c) ZIF-90-II and (d) ZIF-90-III at 90 °C under ambient pressure.

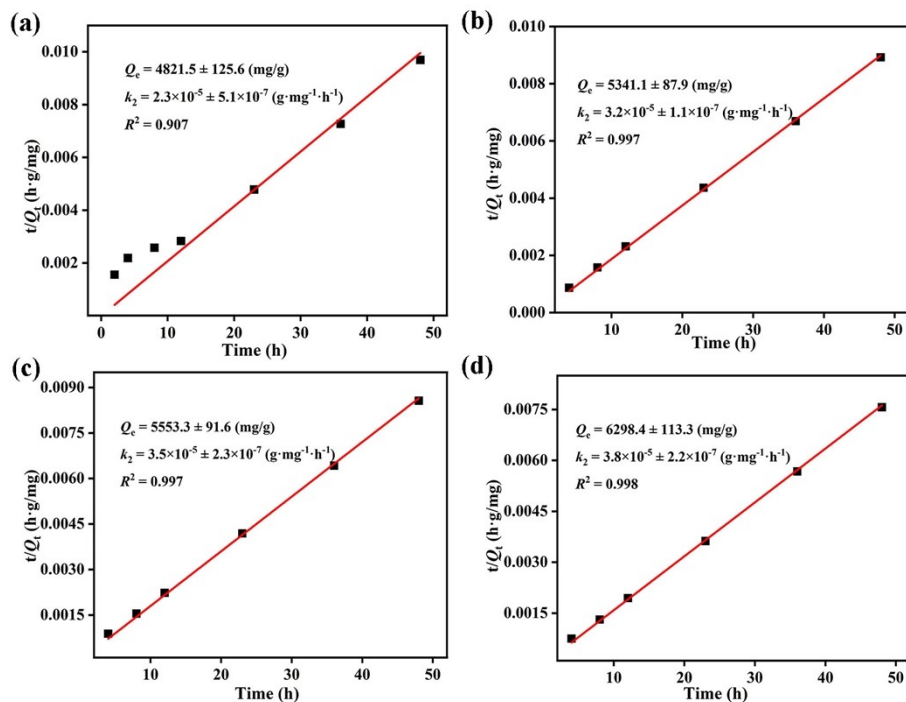

**Fig. S23** The pseudo-second kinetic models for iodine vapour adsorption kinetics of (a) ZIF-90, (b) ZIF-90-I, (c) ZIF-90-II and (d) ZIF-90-III at 90 °C under ambient pressure.

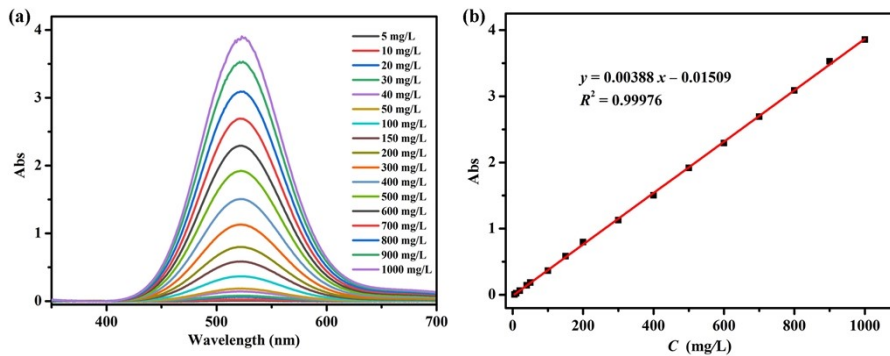

Fig. S24 The standard curve of iodine/cyclohexane solution.

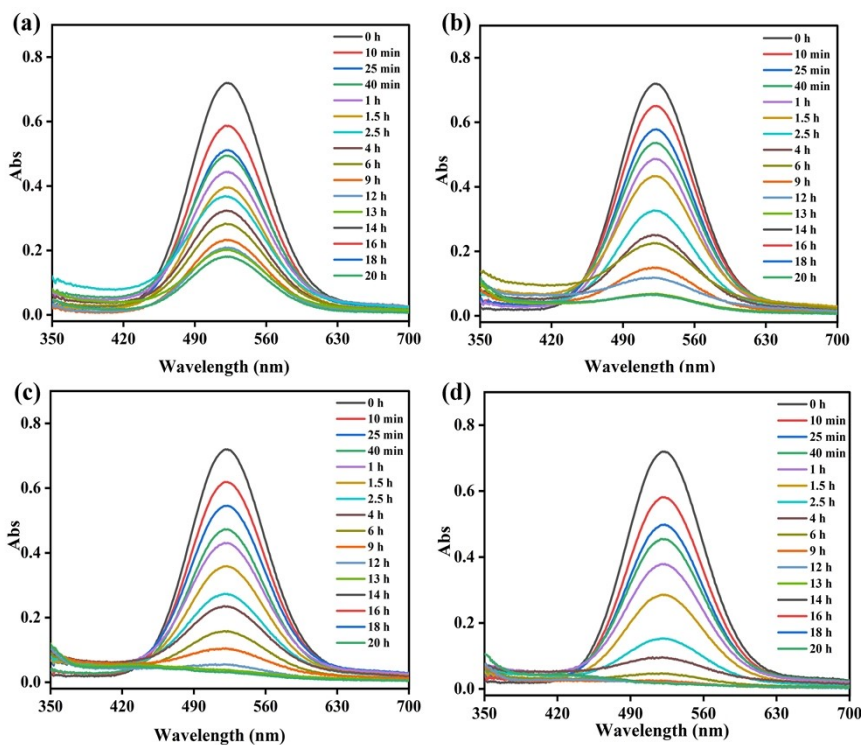

Fig. S25 Temporal evolution of UV-vis absorption spectra for iodine adsorption by (a) ZIF-90, (b) ZIF-90-I, (c) ZIF-90-II and (d) ZIF-90-III in 5 mL of 200 mg/L iodine/cyclohexane solution.

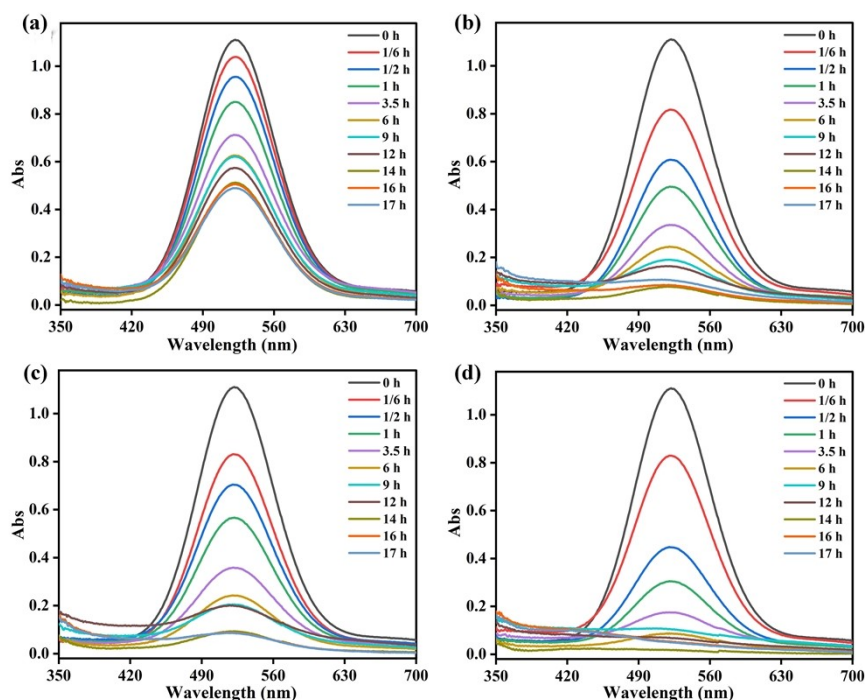

**Fig. S26** Temporal evolution of UV-vis absorption spectra for iodine adsorption by (a) ZIF-90, (b) ZIF-90-I, (c) ZIF-90-II and (d) ZIF-90-III in 5 mL of 300 mg/L iodine/cyclohexane solution.

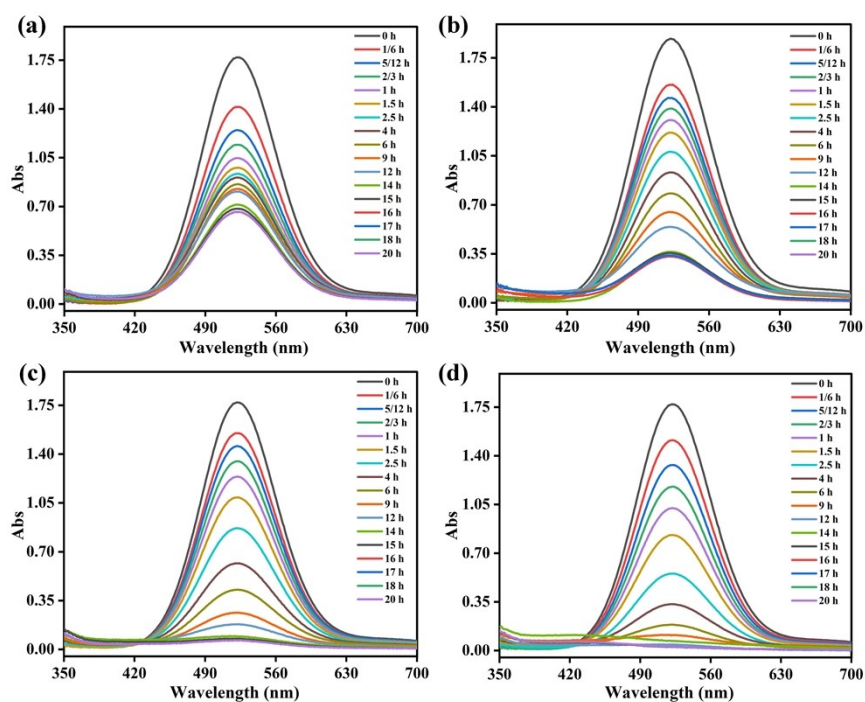

**Fig. S27** Temporal evolution of UV-vis absorption spectra for iodine adsorption by (a) ZIF-90, (b) ZIF-90-I, (c) ZIF-90-II and (d) ZIF-90-III in 5 mL of 500 mg/L iodine/cyclohexane solution.



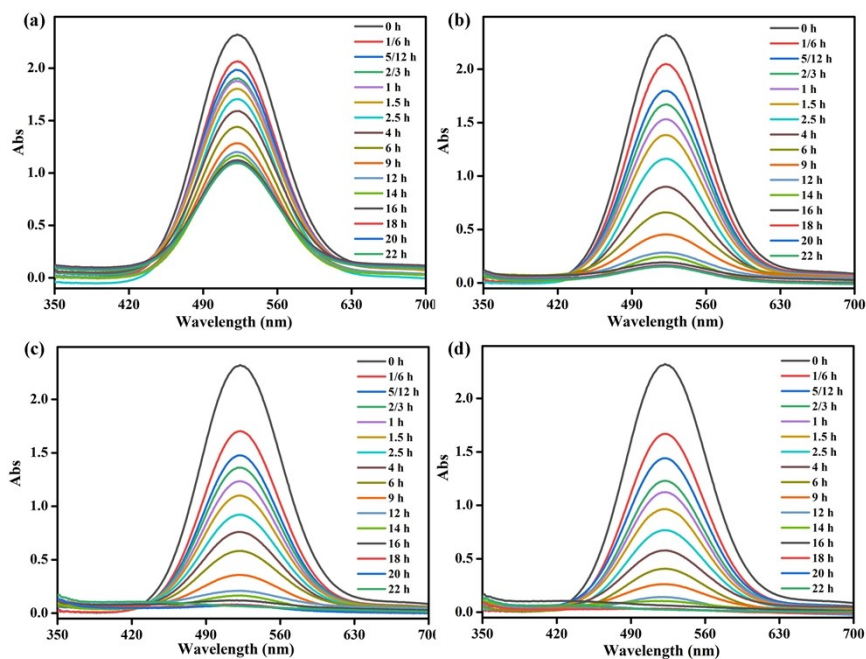

**Fig. S28** Temporal evolution of UV-vis absorption spectra for iodine adsorption by (a) ZIF-90, (b) ZIF-90-I, (c) ZIF-90-II and (d) ZIF-90-III in 5 mL of 600 mg/L iodine/cyclohexane solution.

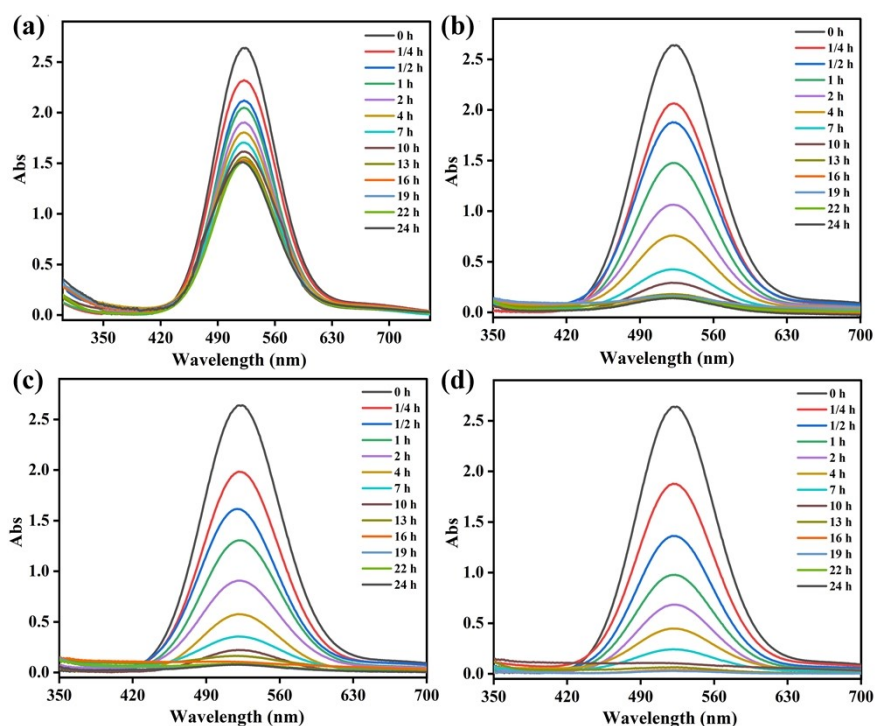

**Fig. S29** Temporal evolution of UV-vis absorption spectra for iodine adsorption by (a) ZIF-90, (b) ZIF-90-I, (c) ZIF-90-II and (d) ZIF-90-III in 5 mL of 800 mg/L iodine/cyclohexane solution.

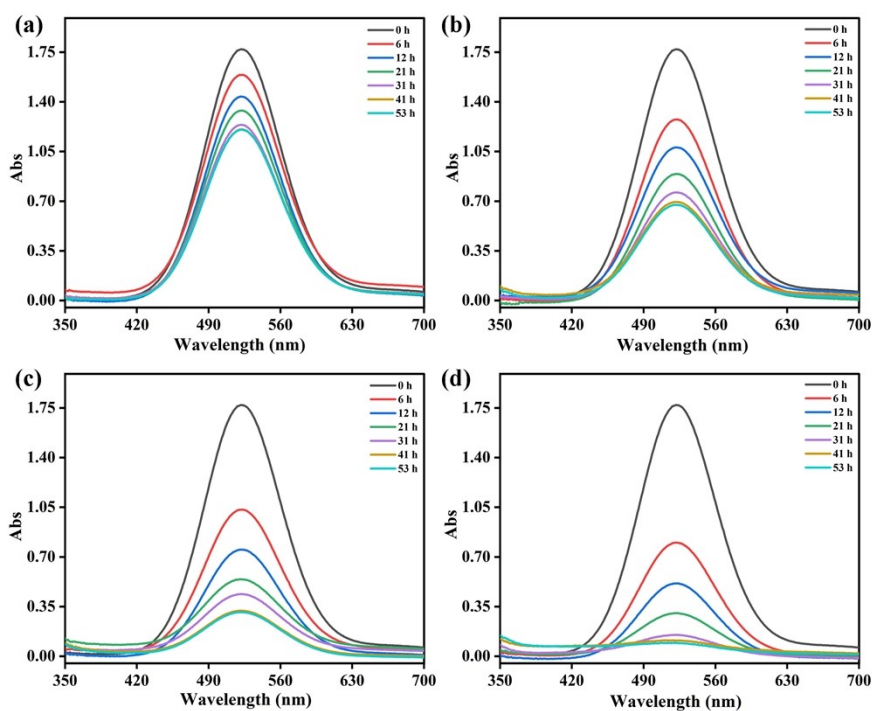

**Fig. S30** Temporal evolution of UV-vis absorption spectra for iodine adsorption by (a) ZIF-90, (b) ZIF-90-I, (c) ZIF-90-II and (d) ZIF-90-III in 15 mL of 500 mg/L iodine/cyclohexane solution.

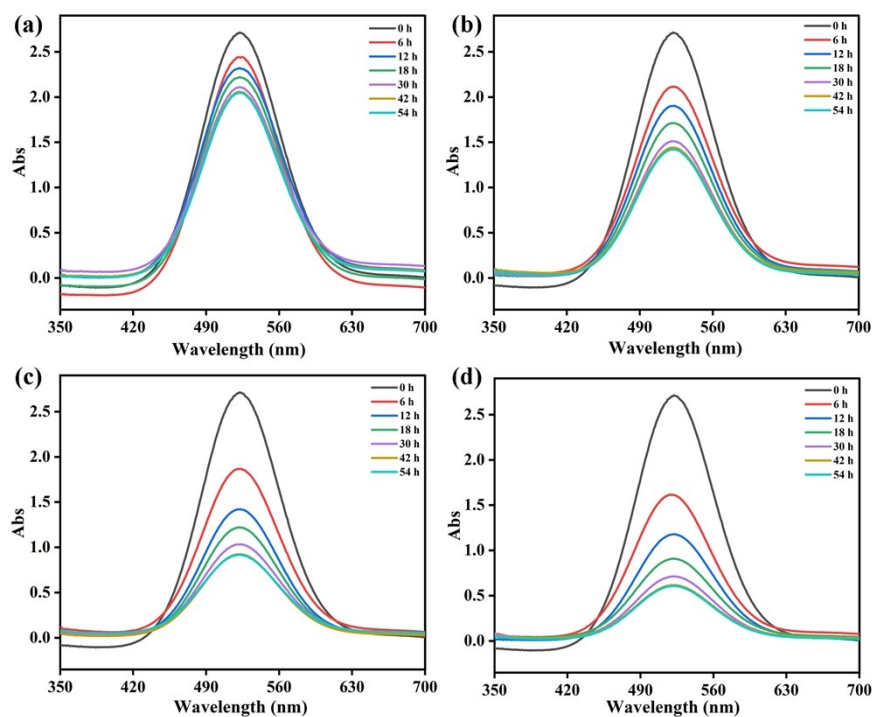

**Fig. S31** Temporal evolution of UV-vis absorption spectra for iodine adsorption by (a) ZIF-90, (b) ZIF-90-I, (c) ZIF-90-II and (d) ZIF-90-III in 15 mL of 700 mg/L iodine/cyclohexane solution.

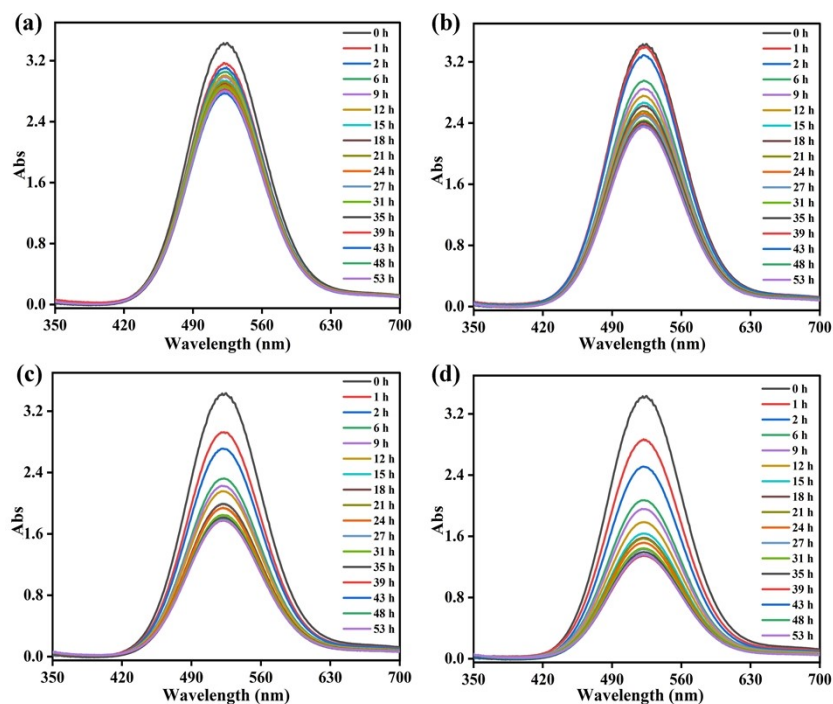

**Fig. S32** Temporal evolution of UV-vis absorption spectra for iodine adsorption by (a) ZIF-90, (b) ZIF-90-I, (c) ZIF-90-II and (d) ZIF-90-III in 15 mL of 1000 mg/L iodine/cyclohexane solution.

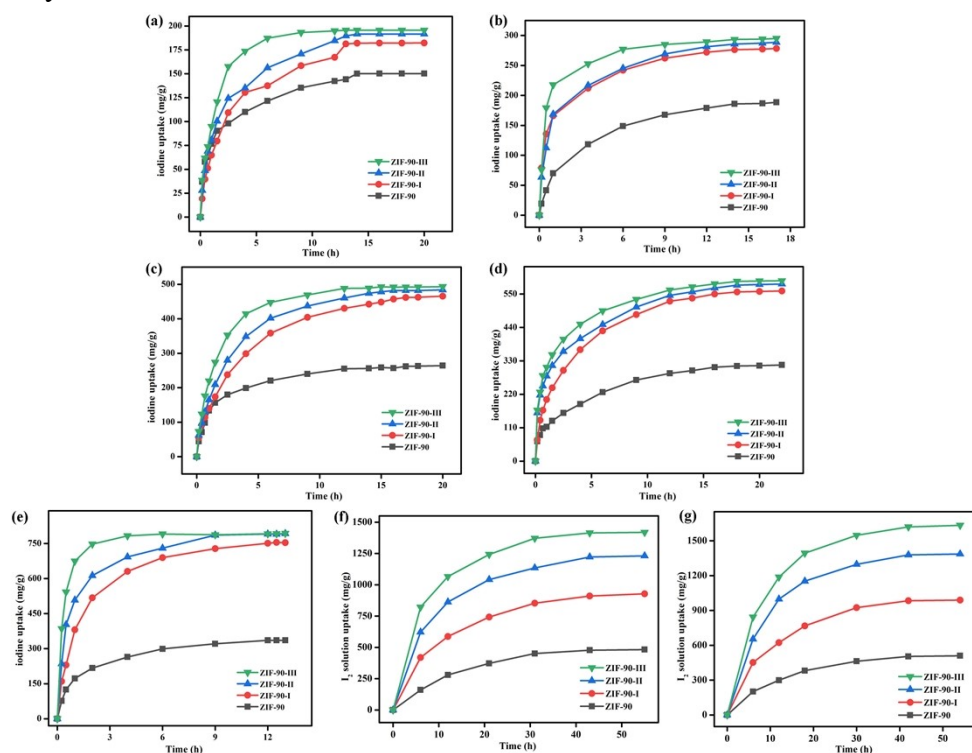

**Fig. S33** Iodine adsorption plots of ZIF-90 and ZIF-90-I–ZIF-90-III in iodine/cyclohexane solutions with different concentrations and volumes at room temperature.

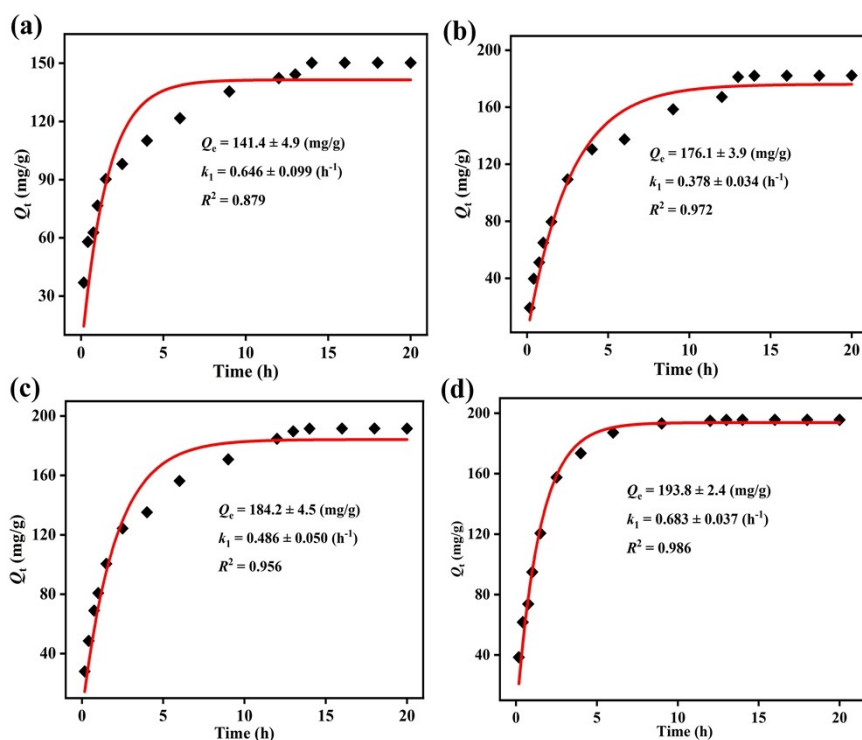

**Fig. S34** The pseudo-first kinetic models for iodine adsorption kinetics of (a) **ZIF-90**, (b) **ZIF-90-I**, (c) **ZIF-90-II** and (d) **ZIF-90-III** in 5 mL of 200 mg/L iodine/cyclohexane solution.

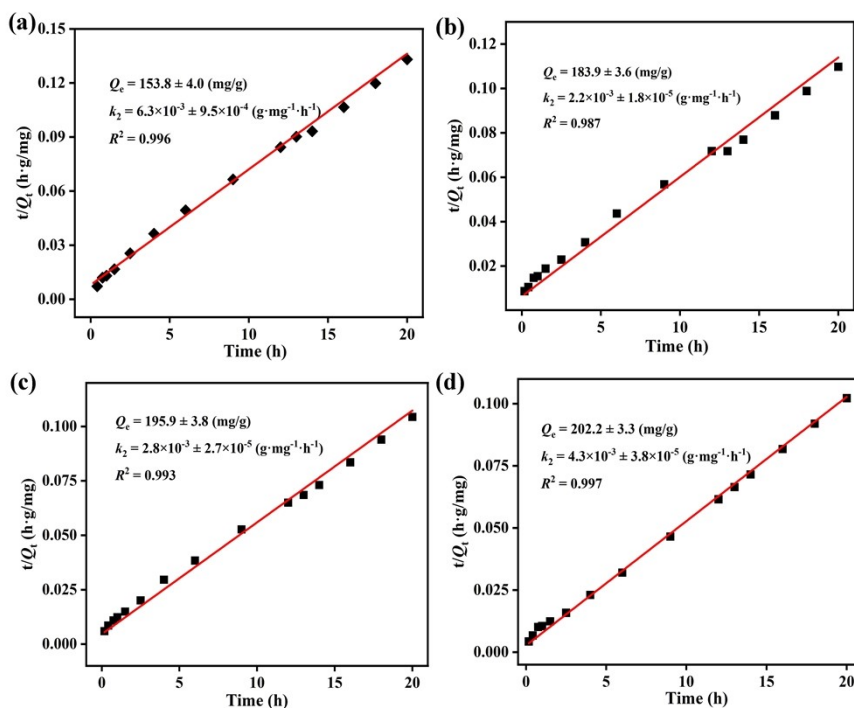

**Fig. S35** The pseudo-second kinetic models for iodine adsorption kinetics of (a) **ZIF-90**, (b) **ZIF-90-I**, (c) **ZIF-90-II** and (d) **ZIF-90-III** in 5 mL of 200 mg/L iodine/cyclohexane solution.

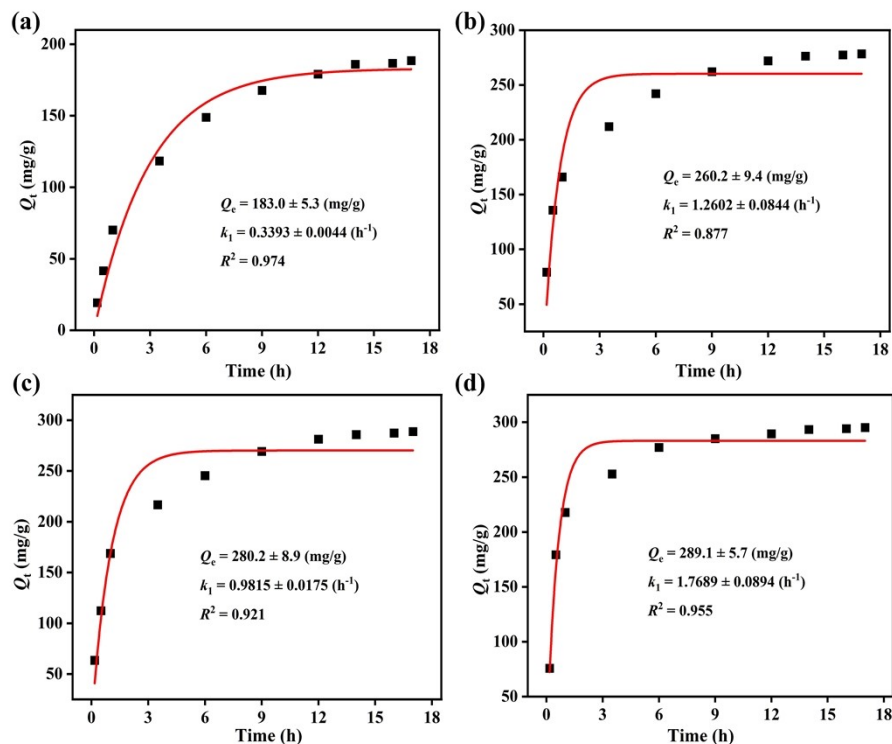

**Fig. S36** The pseudo-first kinetic models for iodine adsorption kinetics of (a) **ZIF-90**, (b) **ZIF-90-I**, (c) **ZIF-90-II** and (d) **ZIF-90-III** in 5 mL of 300 mg/L iodine/cyclohexane solution.

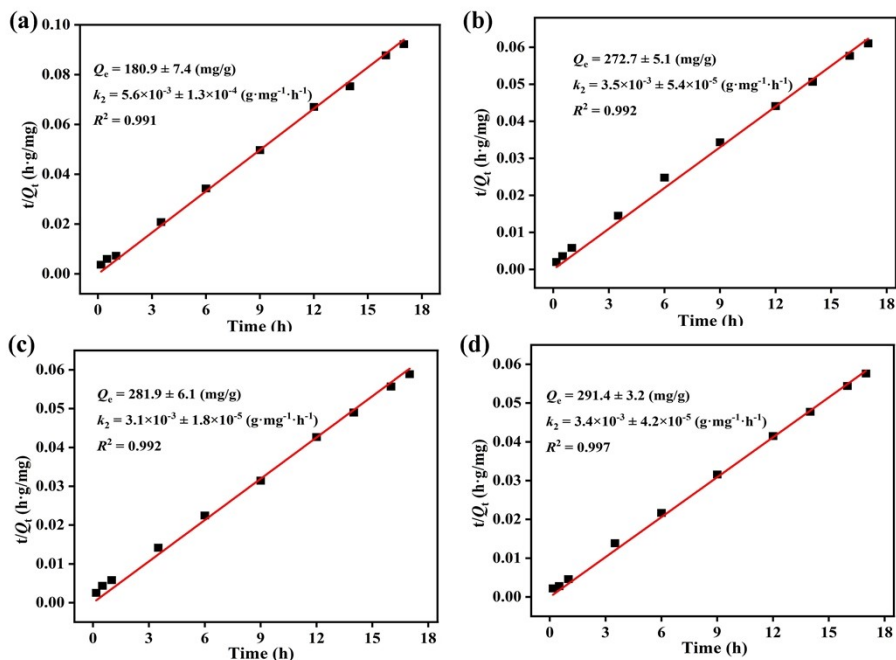

**Fig. S37** The pseudo-second kinetic models for iodine adsorption kinetics of (a) **ZIF-90**, (b) **ZIF-90-I**, (c) **ZIF-90-II** and (d) **ZIF-90-III** in 5 mL of 300 mg/L iodine/cyclohexane solution.

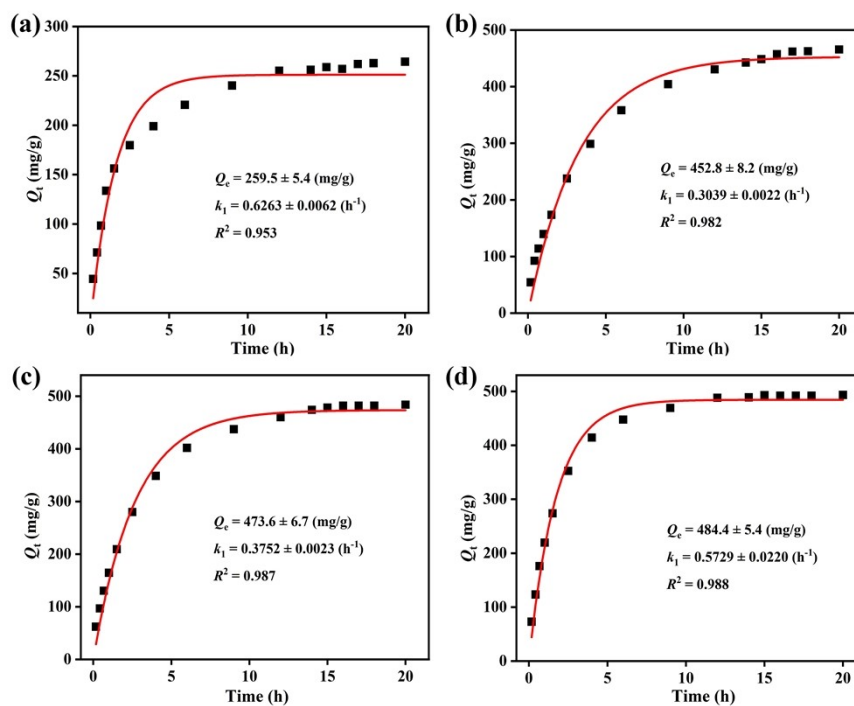

**Fig. S38** The pseudo-first kinetic models for iodine adsorption kinetics of (a) **ZIF-90**, (b) **ZIF-90-I**, (c) **ZIF-90-II** and (d) **ZIF-90-III** in 5 mL of 500 mg/L iodine/cyclohexane solution.

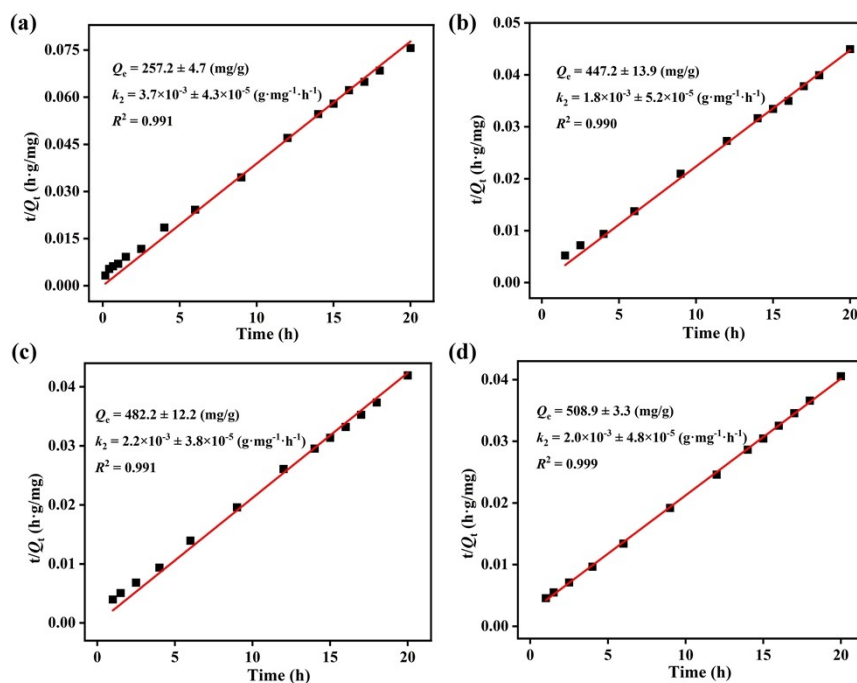

**Fig. S39** The pseudo-second kinetic models for iodine adsorption kinetics of (a) **ZIF-90**, (b) **ZIF-90-I**, (c) **ZIF-90-II** and (d) **ZIF-90-III** in 5 mL of 500 mg/L iodine/cyclohexane solution.

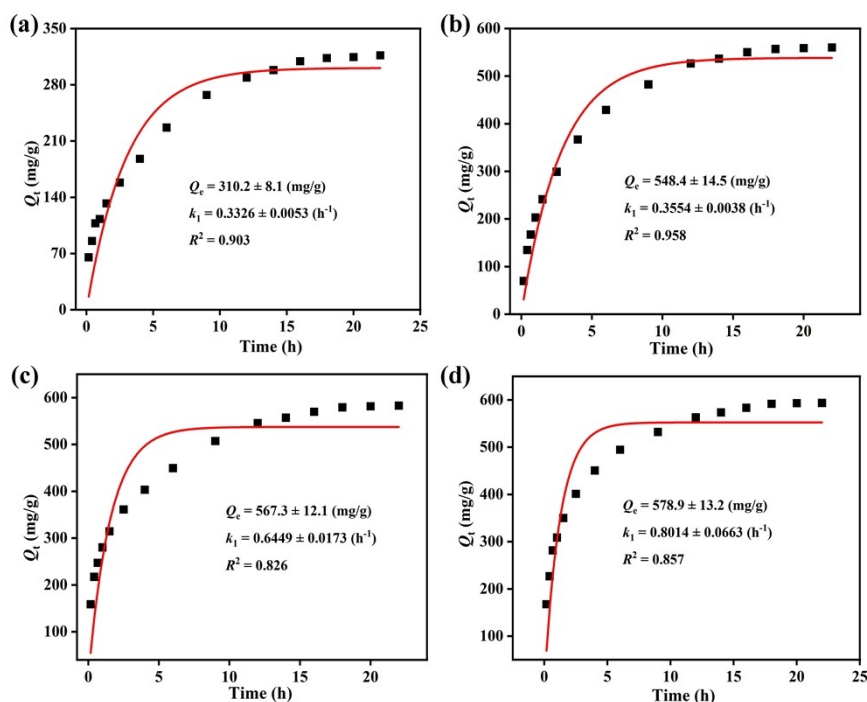

**Fig. S40** The pseudo-first kinetic models for iodine adsorption kinetics of (a) **ZIF-90**, (b) **ZIF-90-I**, (c) **ZIF-90-II** and (d) **ZIF-90-III** in 5 mL of 600 mg/L iodine/cyclohexane solution.

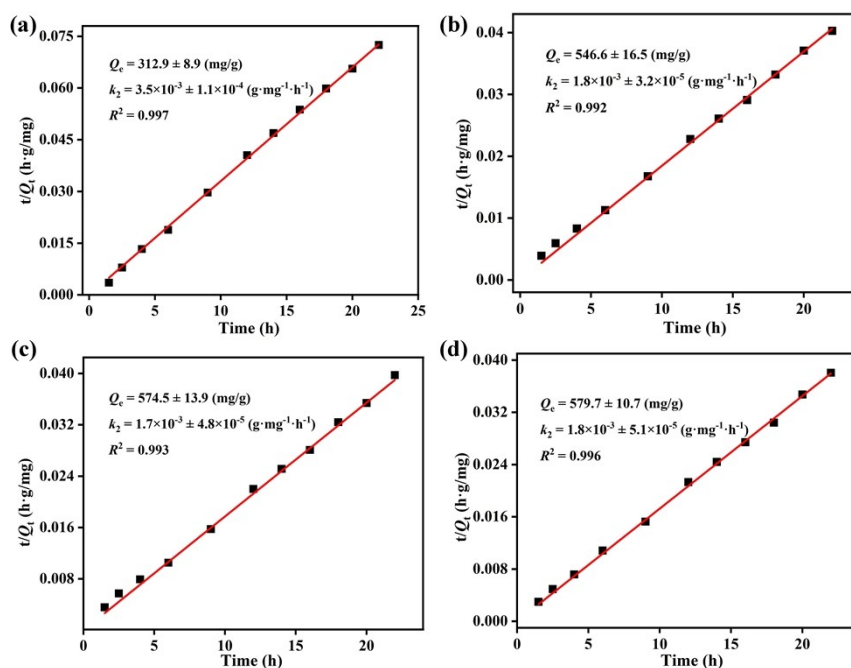

**Fig. S41** The pseudo-second kinetic models for iodine adsorption kinetics of (a) **ZIF-90**, (b) **ZIF-90-I**, (c) **ZIF-90-II** and (d) **ZIF-90-III** in 5 mL of 600 mg/L iodine/cyclohexane solution.

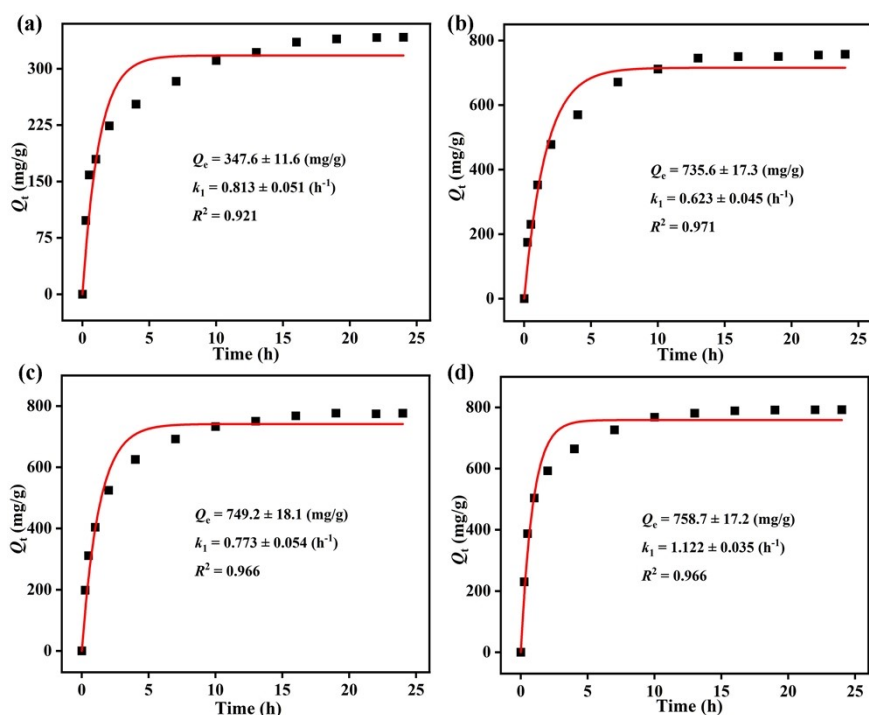

**Fig. S42** The pseudo-first kinetic models for iodine adsorption kinetics of (a) **ZIF-90**, (b) **ZIF-90-I**, (c) **ZIF-90-II** and (d) **ZIF-90-III** in 5 mL of 800 mg/L iodine/cyclohexane solution.

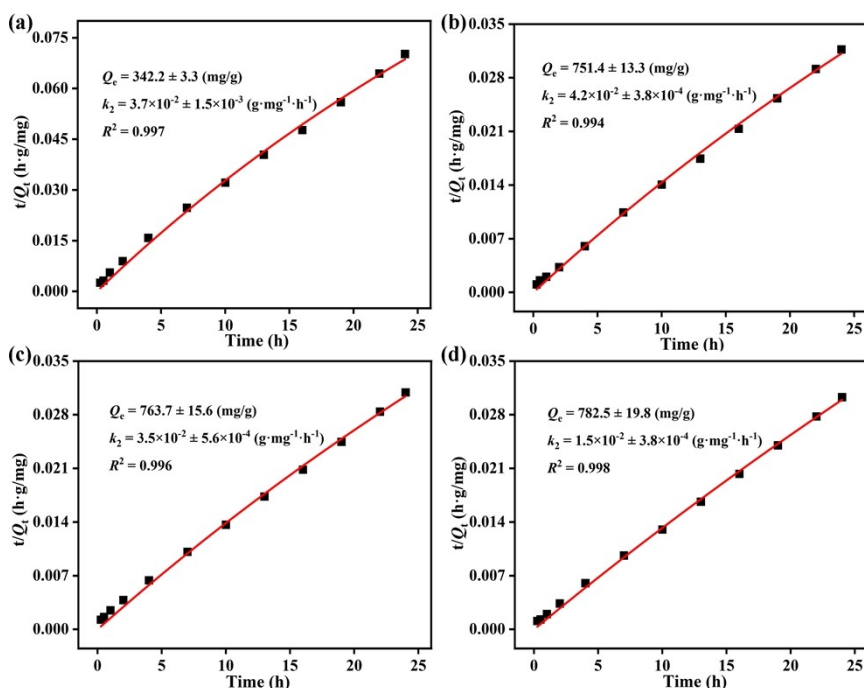

**Fig. S43** The pseudo-second kinetic models for iodine adsorption kinetics of (a) **ZIF-90**, (b) **ZIF-90-I**, (c) **ZIF-90-II** and (d) **ZIF-90-III** in 5 mL of 800 mg/L iodine/cyclohexane solution.



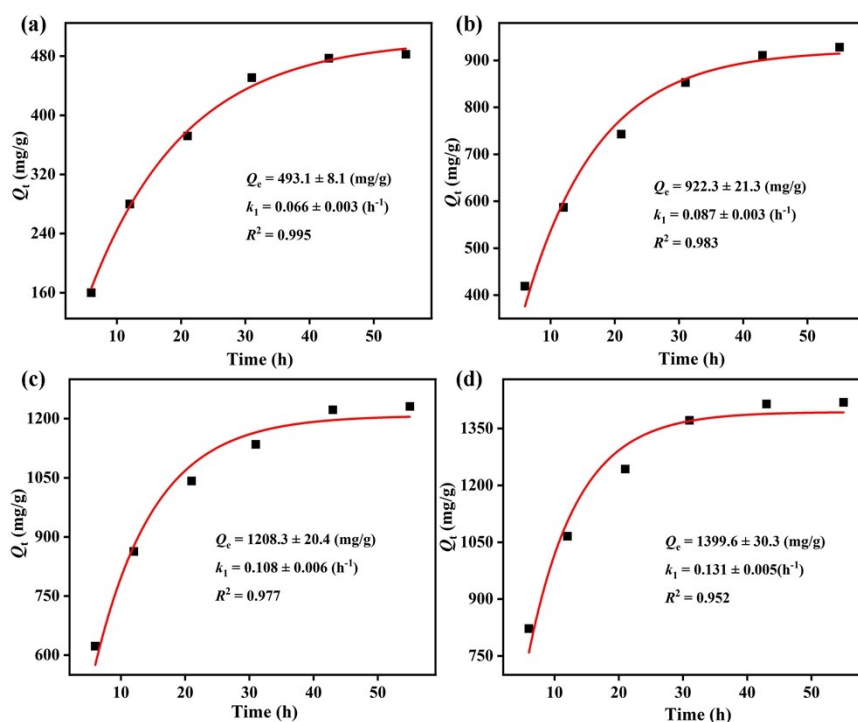

**Fig. S44** The pseudo-first kinetic models for iodine adsorption kinetics of (a) **ZIF-90**, (b) **ZIF-90-I**, (c) **ZIF-90-II** and (d) **ZIF-90-III** in 15 mL of 500 mg/L iodine/cyclohexane solution.

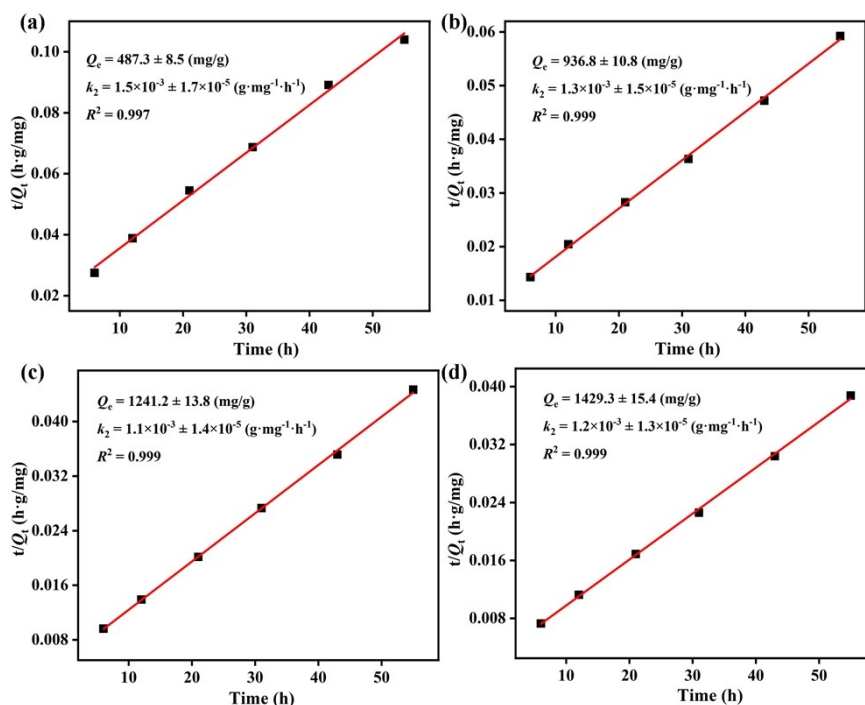

**Fig. S45** The pseudo-second kinetic models for iodine adsorption kinetics of (a) **ZIF-90**, (b) **ZIF-90-I**, (c) **ZIF-90-II** and (d) **ZIF-90-III** in 15 mL of 500 mg/L iodine/cyclohexane solution.

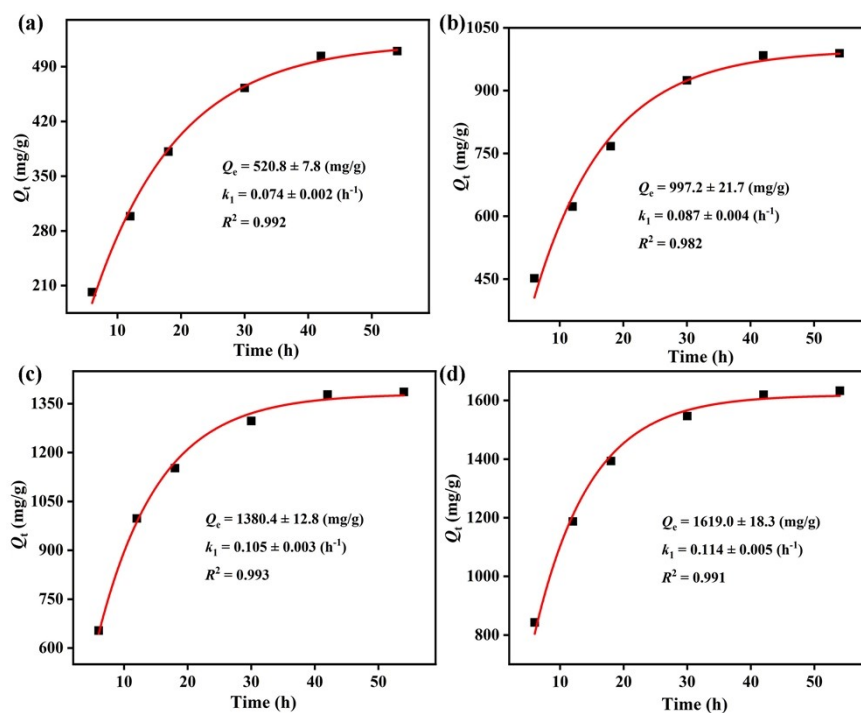

**Fig. S46** The pseudo-first kinetic models for iodine adsorption kinetics of (a) **ZIF-90**, (b) **ZIF-90-I**, (c) **ZIF-90-II** and (d) **ZIF-90-III** in 15 mL of 700 mg/L iodine/cyclohexane solution.

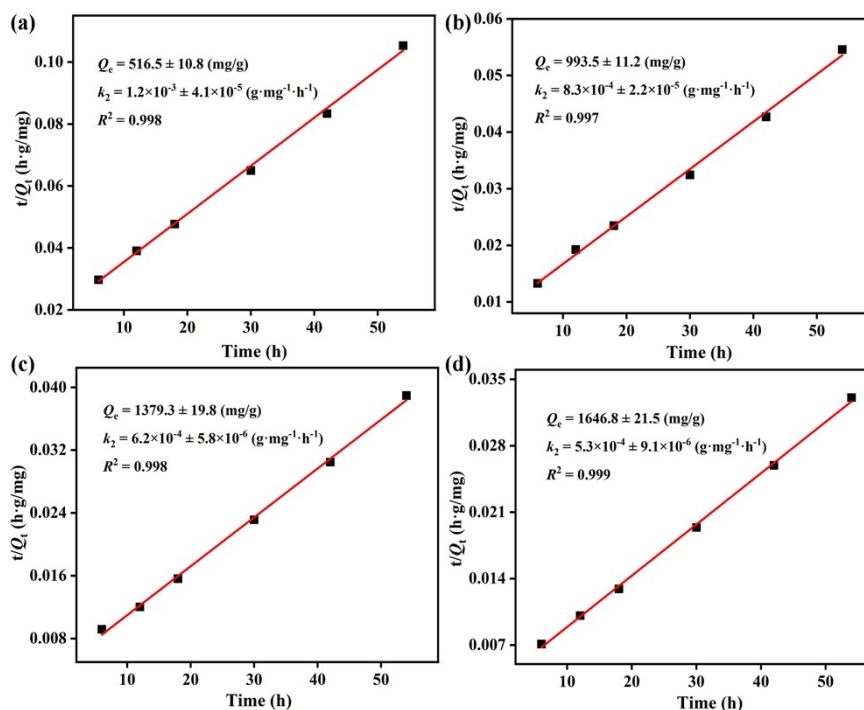

**Fig. S47** The pseudo-second kinetic models for iodine adsorption kinetics of (a) **ZIF-90**, (b) **ZIF-90-I**, (c) **ZIF-90-II** and (d) **ZIF-90-III** in 15 mL of 700 mg/L iodine/cyclohexane solution.

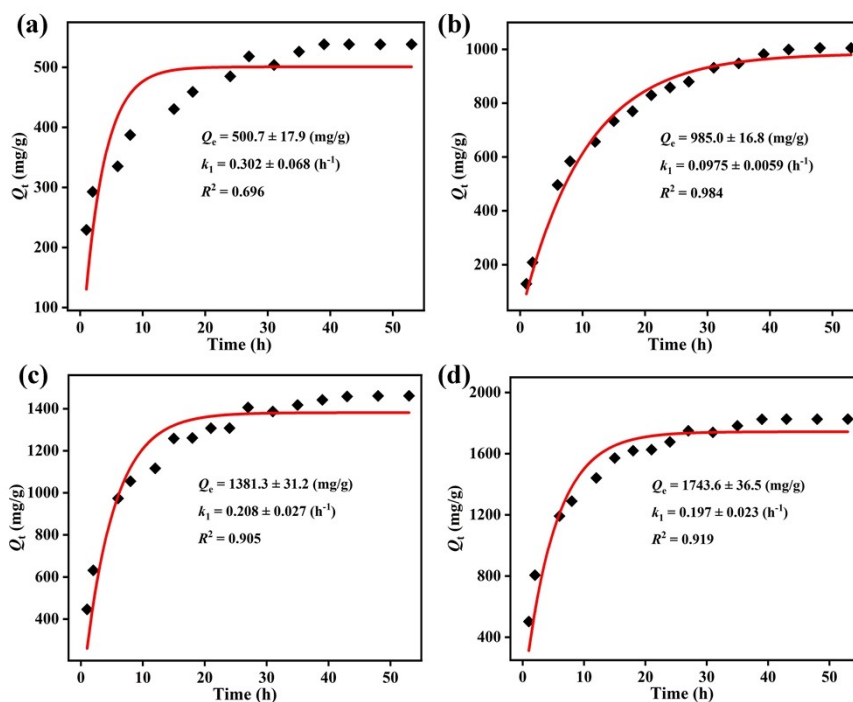

**Fig. S48** The pseudo-first kinetic models for iodine adsorption kinetics of (a) **ZIF-90**, (b) **ZIF-90-I**, (c) **ZIF-90-II** and (d) **ZIF-90-III** in 15 mL of 1000 mg/L iodine/cyclohexane solution.

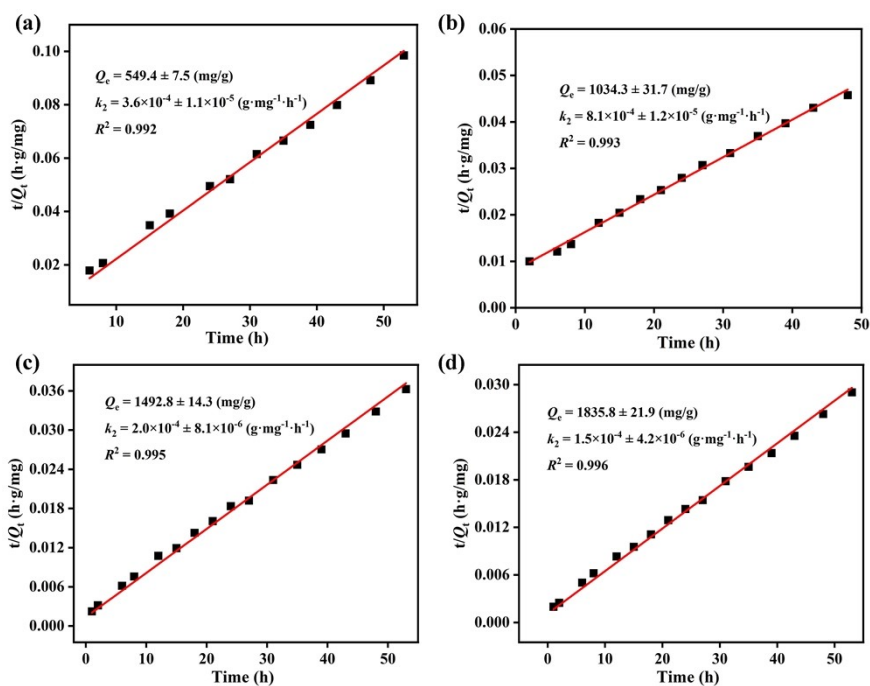

**Fig. S49** The pseudo-second kinetic models for iodine adsorption kinetics of (a) **ZIF-90**, (b) **ZIF-90-I**, (c) **ZIF-90-II** and (d) **ZIF-90-III** in 15 mL of 1000 mg/L iodine/cyclohexane solution.

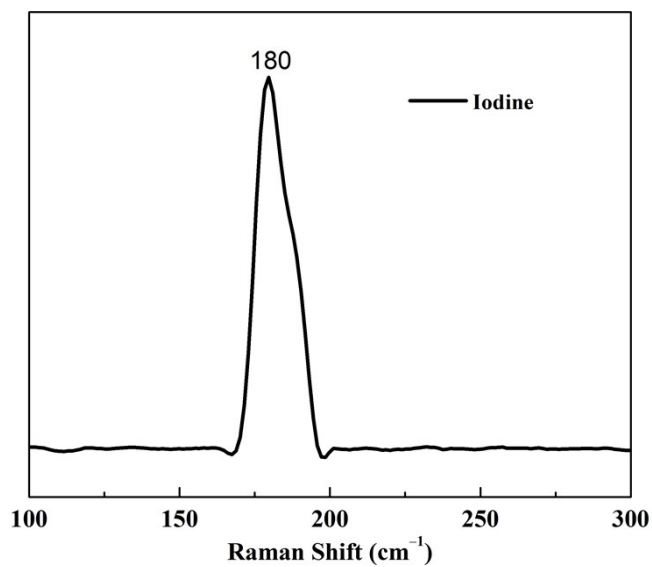

Fig. S50 Raman spectrum of pure I<sub>2</sub>.

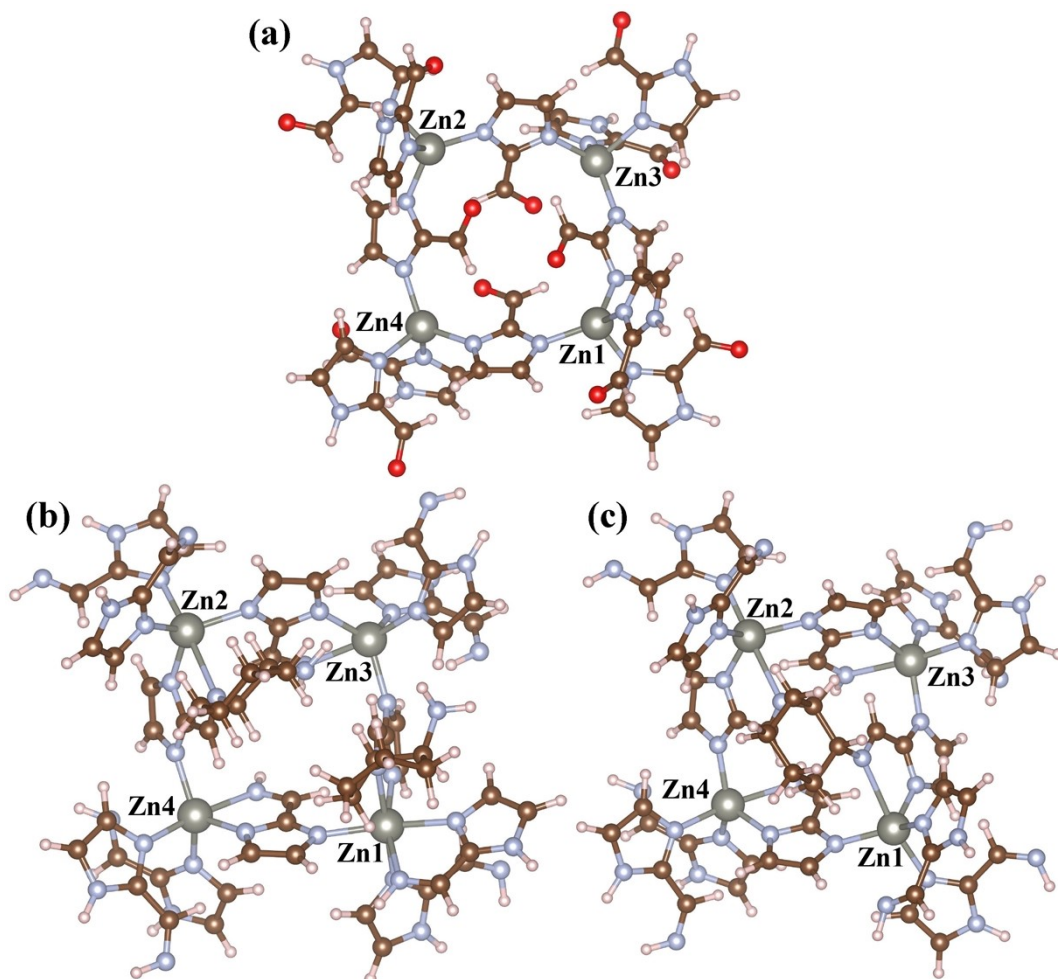

Fig. S51 Optimized geometries of the clusters for (a) ZIF-90, (b) ZIF-90-mono and (c) ZIF-90-bis (Zn: gray, O: red, C: brown, N: blue, and H: light pink).

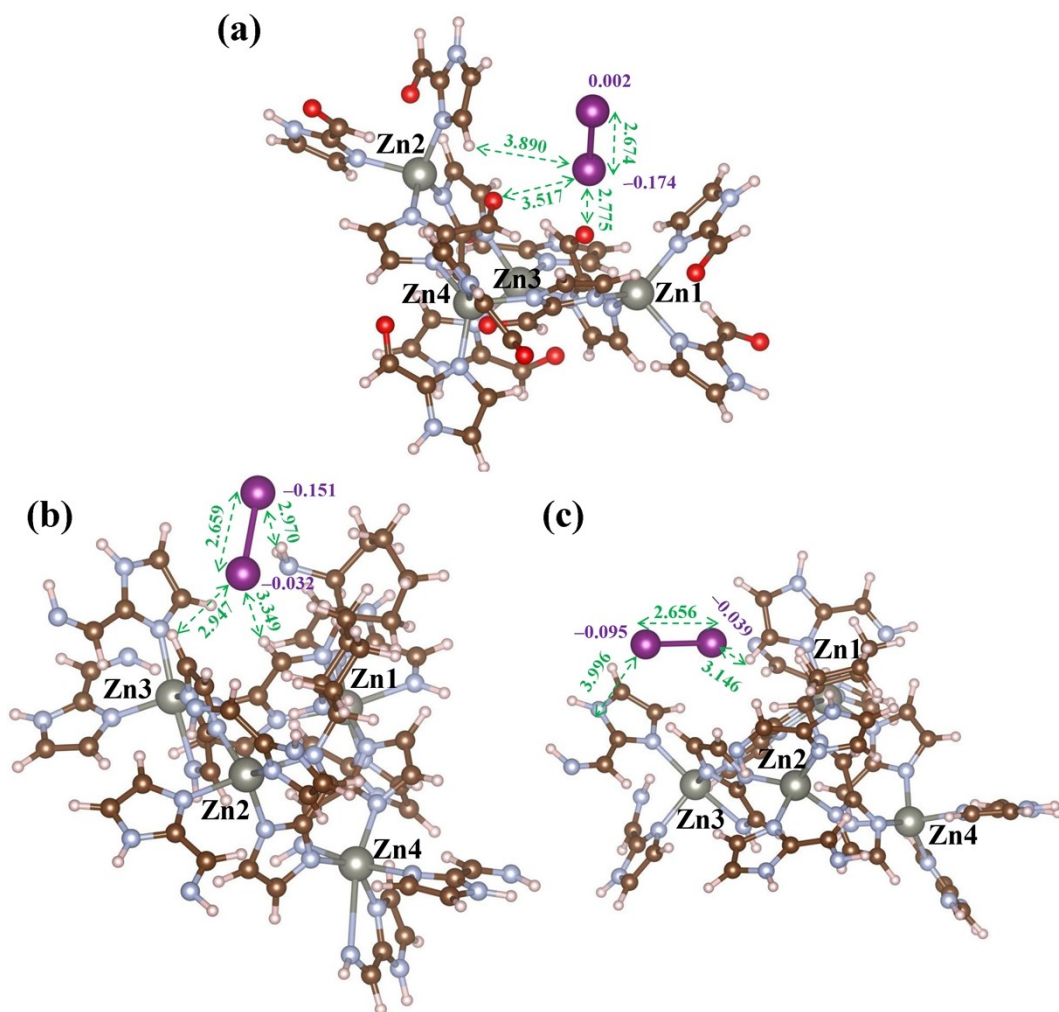

**Fig. S52** Optimized geometries of composites with an iodine molecule and the cluster of (a) ZIF-90, (b) ZIF-90-mono and (c) ZIF-90-bis, respectively. The purple texts are the Mulliken charges ( $e$ ) of iodine atoms. The green texts are the distances (Å) between two atoms labeled by the related green arrow. (Zn: gray, O: red, C: brown, N: blue, and H: light pink).

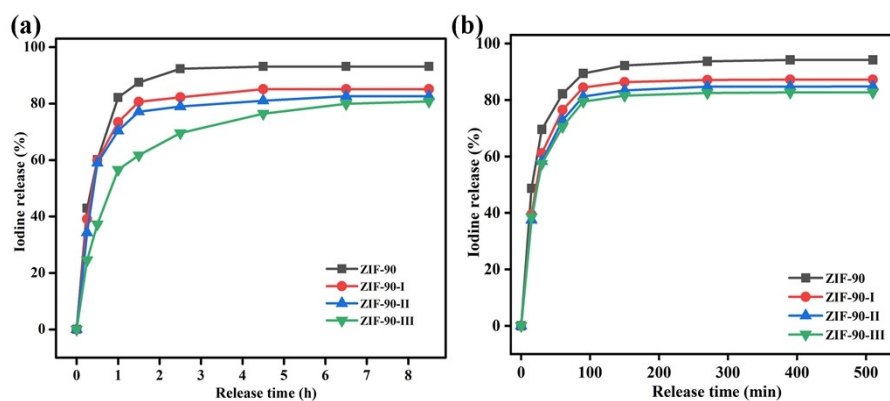

**Fig. S53** Iodine release experiments of iodine-loaded **ZIF-90** and **ZIF-90-I–ZIF-90-III** with iodine from (a) iodine vapour, (b) iodine/cyclohexane solution at 120 °C.

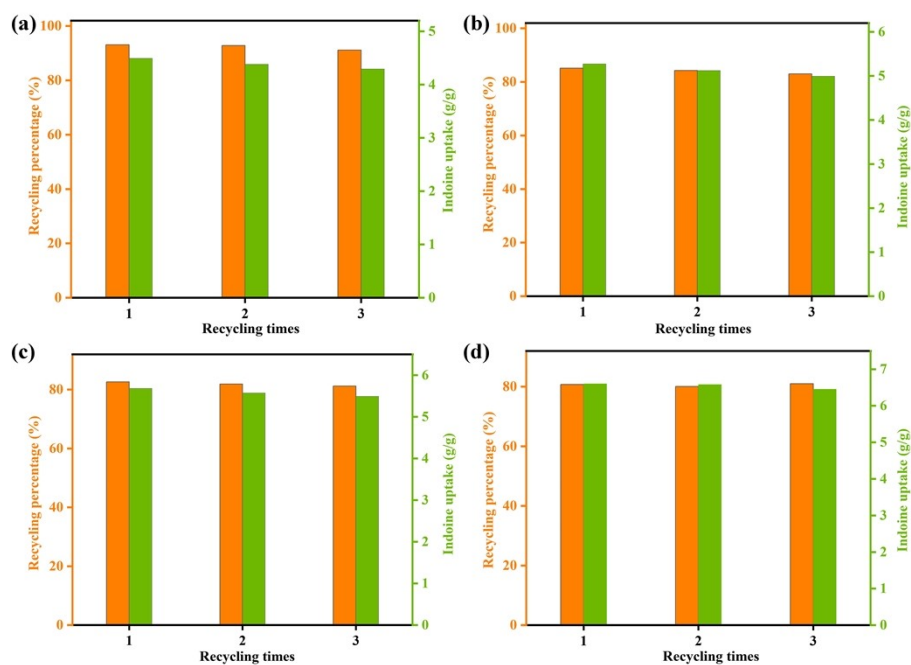

**Fig. S54** Recycling tests of (a) **ZIF-90**, (b) **ZIF-90-I**, (c) **ZIF-90-II** and (d) **ZIF-90-III** for iodine vapour.

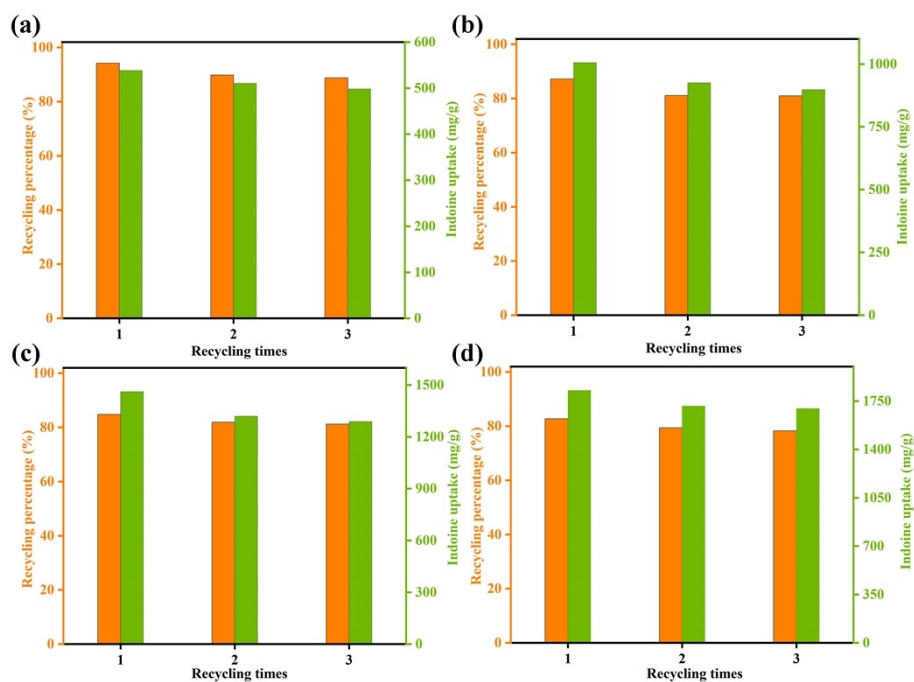

**Fig. S55** Recycling tests of (a) ZIF-90, (b) ZIF-90-I, (c) ZIF-90-II and (d) ZIF-90-III for iodine/cyclohexane solution.

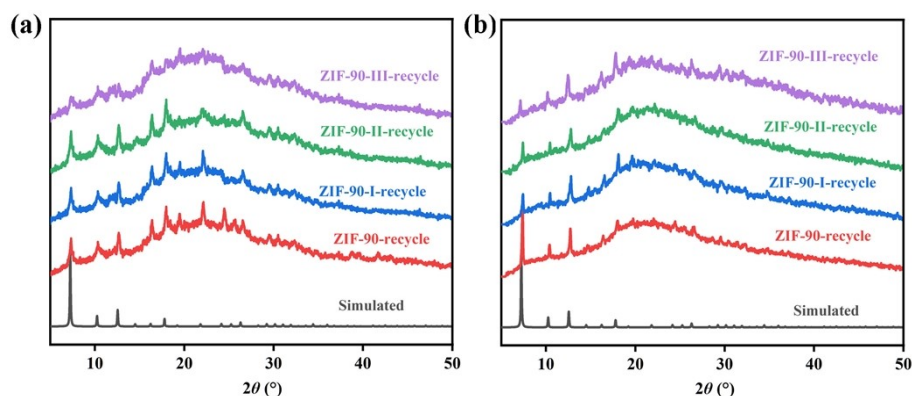

**Fig. S56** PXRD patterns of recovered ZIF-90 and ZIF-90-I-ZIF-90-III after iodine release experiments (iodine came from (a) iodine vapour and (b) iodine/cyclohexane solution).

**Table S1** Experimental and calculated  $m/z$  values of the isotopic envelopes for digested **ZIF-90**

| Chemistry Formula                         | Experimental $m/z$ value | Calculated $m/z$ value |
|-------------------------------------------|--------------------------|------------------------|
| $[\text{H}(\text{L}^1)]^+$                | 97.04                    | 97.04                  |
| $[(\text{HCOOH})(\text{H}_3\text{O})]^+$  | 111.05                   | 111.03                 |
| $[\text{Zn}(\text{L}^1)]^+$               | 160.90                   | 160.95                 |
| $[\text{Zn}(\text{L}^1)(\text{HCOOH})]^+$ | 204.90                   | 204.96                 |
| $\text{Zn}[\text{H}(\text{L}^1)_2]^+$     | 254.90                   | 254.99                 |

**Table S2** Experimental and calculated  $m/z$  values of the isotopic envelopes for digested **ZIF-90-I**

| Chemistry Formula                                             | Experimental $m / z$ value | Calculated $m / z$ value |
|---------------------------------------------------------------|----------------------------|--------------------------|
| $[\text{H}(\text{L}^1)]^+$                                    | 97.04                      | 97.04                    |
| $[(\text{HCOOH})(\text{H}_3\text{O})]^+$                      | 111.05                     | 111.03                   |
| $[(\text{HCOOH})_2(\text{CH}_3\text{OH})\text{H}]^+$          | 125.10                     | 125.10                   |
| $[\text{Zn}(\text{L}^1)]^+$                                   | 160.90                     | 160.95                   |
| $[\text{Zn}(\text{L}^1)(\text{H}_2\text{O})]^+$               | 179.00                     | 178.96                   |
| $[\text{Zn}(\text{L}^1)(\text{HCOOH})]^+$                     | 204.90                     | 204.96                   |
| $[\text{Zn}(\text{L}^1)(\text{HCOOH})(\text{H}_2\text{O})]^+$ | 223.04                     | 222.97                   |
| $[\text{Zn}(\text{L}^2)]^+$                                   | 255.06                     | 255.06                   |
| $[\text{Zn}(\text{L}^2)(\text{H}_2\text{O})]^+$               | 273.06                     | 273.07                   |
| $[\text{Zn}(\text{L}^2)(\text{HCOOH})]^+$                     | 301.06                     | 301.06                   |
| $[\text{Zn}(\text{L}^3)]^+$                                   | 333.09                     | 333.08                   |

**Table S3** Experimental and calculated  $m/z$  values of the isotopic envelopes for digested **ZIF-90-II**

| Chemistry Formula                                    | Experimental $m/z$ value | Calculated $m/z$ value |
|------------------------------------------------------|--------------------------|------------------------|
| $[\text{H}(\text{L}^1)]^+$                           | 97.04                    | 97.04                  |
| $[(\text{HCOOH})(\text{H}_3\text{O})]^+$             | 111.05                   | 111.03                 |
| $[(\text{HCOOH})_2(\text{CH}_3\text{OH})\text{H}]^+$ | 125.10                   | 125.10                 |
| $[\text{Zn}(\text{L}^1)]^+$                          | 160.90                   | 160.95                 |
| $[\text{Zn}(\text{L}^1)(\text{HCOOH})]^+$            | 204.90                   | 204.96                 |
| $[\text{Zn}(\text{L}^2)]^+$                          | 255.06                   | 255.06                 |
| $[\text{Zn}(\text{L}^2)(\text{H}_2\text{O})]^+$      | 273.06                   | 273.07                 |
| $[\text{Zn}(\text{L}^2)(\text{HCOOH})]^+$            | 301.06                   | 301.06                 |
| $[\text{Zn}(\text{L}^3)]^+$                          | 333.09                   | 333.08                 |



**Table S4** Experimental and calculated  $m/z$  values of the isotopic envelopes for digested **ZIF-90-III**

| Chemistry Formula                                    | Experimental $m/z$ value | Calculated $m/z$ value |
|------------------------------------------------------|--------------------------|------------------------|
| $[\text{H}(\text{L}^1)]^+$                           | 97.04                    | 97.04                  |
| $[(\text{HCOOH})(\text{H}_3\text{O})]^+$             | 111.05                   | 111.03                 |
| $[(\text{HCOOH})_2(\text{CH}_3\text{OH})\text{H}]^+$ | 125.10                   | 125.10                 |
| $[\text{Zn}(\text{L}^1)]^+$                          | 160.90                   | 160.95                 |
| $[\text{Zn}(\text{L}^1)(\text{H}_2\text{O})]^+$      | 179.00                   | 178.96                 |
| $[\text{Zn}(\text{L}^1)(\text{HCOOH})]^+$            | 204.90                   | 204.96                 |
| $[\text{Zn}(\text{L}^2)]^+$                          | 255.06                   | 255.06                 |
| $[\text{Zn}(\text{L}^2)(\text{H}_2\text{O})]^+$      | 273.06                   | 273.07                 |
| $[\text{Zn}(\text{L}^2)(\text{HCOOH})]^+$            | 301.06                   | 301.06                 |
| $[\text{Zn}(\text{L}^3)]^+$                          | 333.09                   | 333.08                 |

**Table S5** Summary of iodine adsorption in MOFs via vapor diffusion

| MOF                                                                                            | Iodine uptake (g/g) | Ref.      |
|------------------------------------------------------------------------------------------------|---------------------|-----------|
| IL@PCN-333(Al)                                                                                 | 7.35                | 1         |
| ZIF-90-III                                                                                     | 6.60                | this work |
| ZIF-90-II                                                                                      | 5.68                | this work |
| ZIF-90-I                                                                                       | 5.27                | this work |
| ZIF-90                                                                                         | 4.49                | this work |
| PCN-333(Al)                                                                                    | 4.42                | 1         |
| Cu@MIL-101                                                                                     | 3.42                | 2         |
| UPC-158-HCl                                                                                    | 2.92                | 3         |
| $[\text{Zr}_6\text{O}_4(\text{OH})_4(\text{peb})_6]$                                           | 2.79                | 4         |
| UPC-158-HBr                                                                                    | 2.75                | 3         |
| UPC-158-HI                                                                                     | 2.59                | 3         |
| $\text{Ti}_{16}\text{Pb}_5\text{O}_{16}(\text{C}_6\text{H}_5\text{CO}_2)_2(\text{OCH}_3)_{40}$ | 2.2                 | 5         |
| UPC-158-HF                                                                                     | 2.19                | 3         |
| MOF-808                                                                                        | 2.18                | 6         |
| $\text{Zn}_2(\text{tpc})(\text{apy})$                                                          | 2.16                | 7         |
| $[(\text{Cu}_2\text{I}_2)(3\text{-TPPM})](\text{DMF})_3(\text{H}_2\text{O})_{1.3}$             | 1.90                | 8         |
| UPC-158                                                                                        | 1.78                | 3         |
| Cu-BTC                                                                                         | 1.75                | 9         |
| $[(\text{ZnI}_2)_3(\text{TPT})_2]$                                                             | 1.73                | 10        |
| MFM-300(Sc)                                                                                    | 1.54                | 11        |
| NU-1000                                                                                        | 1.45                | 6         |
| MOF-808@PVDF                                                                                   | 1.42                | 12        |
| MFM-300(Fe)                                                                                    | 1.29                | 11        |
| ZIF-8                                                                                          | 1.25                | 13        |

|                                        |       |    |
|----------------------------------------|-------|----|
| Th-SINAP-1                             | 1.24  | 14 |
| UiO-67-(NH <sub>2</sub> ) <sub>2</sub> | 1.211 | 15 |
| ZrTBPA-ns                              | 1.20  | 16 |
| MFM-300(In)                            | 1.16  | 11 |
| DUT-68(Zr)                             | 1.081 | 17 |
| JNU-200                                | 1.08  | 18 |
| UiO-67-NH <sub>2</sub>                 | 1.071 | 15 |
| ZrTBPA-tb                              | 0.95  | 16 |
| MFM-300(Al)                            | 0.94  | 11 |
| MOF-867                                | 0.88  | 6  |
| AIOC-155                               | 0.86  | 19 |
| DUT-67(Zr)                             | 0.843 | 17 |
| AIOC-151                               | 0.73  | 19 |
| UIO-66                                 | 0.66  | 6  |
| UiO-67-CH <sub>2</sub> NH <sub>2</sub> | 0.660 | 15 |
| UiO-66-NH <sub>2</sub>                 | 0.565 | 15 |
| UIO-67                                 | 0.53  | 6  |
| Ca(tcpb)                               | 0.43  | 20 |
| UiO-66-(OH) <sub>2</sub>               | 0.388 | 15 |
| HKUST-1@PES                            | 0.376 | 21 |
| HKUST-1@PEI                            | 0.348 | 21 |
| UiO-66-Napht                           | 0.323 | 15 |
| UiO-68-NH <sub>2</sub>                 | 0.300 | 15 |
| UiO-66-NO <sub>2</sub>                 | 0.290 | 15 |
| UiO-66-Br                              | 0.277 | 15 |
| Ca(sdb)                                | 0.226 | 20 |
| UiO-66-CH <sub>3</sub>                 | 0.235 | 15 |
| HKUST-1@PVDF                           | 0.225 | 21 |

**Table S6** The maximum iodine vapor adsorption (mg/g) of **ZIF-90** and **ZIF-90-I-ZIF-90-III** at different temperatures

| Temperature (°C) | ZIF-90 | ZIF-90-I | ZIF-90-II | ZIF-90-III |
|------------------|--------|----------|-----------|------------|
| 40               | 2810   | 3749     | 4001      | 4300       |
| 50               | 3330   | 3887     | 4260      | 4634       |
| 60               | 3350   | 3974     | 4410      | 5210       |
| 75               | 4490   | 5270     | 5680      | 6600       |
| 90               | 4551   | 5380     | 5604      | 6342       |

**Table S7** Adsorption kinetic parameters of iodine vapor adsorption by **ZIF-90** at different temperatures

| Temperature<br>(°C) | $Q_{e, \text{exp}}$<br>(mg/g) | Pseudo-first-order          |                               |       | Pseudo-second-order                             |                               |       |
|---------------------|-------------------------------|-----------------------------|-------------------------------|-------|-------------------------------------------------|-------------------------------|-------|
|                     |                               | $k_1$<br>(h <sup>-1</sup> ) | $Q_{e, \text{cal}}$<br>(mg/g) | $R^2$ | $k_2$<br>(g·mg <sup>-1</sup> ·h <sup>-1</sup> ) | $Q_{e, \text{cal}}$<br>(mg/g) | $R^2$ |
| 40                  | 2810                          | 0.0047                      | 2905.8±21.3                   | 0.971 | 4.2×10 <sup>-7</sup>                            | 2775.1±82.9                   | 0.759 |
| 50                  | 3330                          | 0.0168                      | 3481.4±56.7                   | 0.995 | 9.5×10 <sup>-7</sup>                            | 3405.1±34.6                   | 0.939 |
| 60                  | 3350                          | 0.0401                      | 3445.6±91.3                   | 0.979 | 1.2×10 <sup>-5</sup>                            | 3401.1±44.6                   | 0.864 |
| 75                  | 4490                          | 0.0558                      | 4575.8±91.3                   | 0.991 | 2.1×10 <sup>-5</sup>                            | 4878.1±134.6                  | 0.945 |
| 90                  | 4551                          | 0.0797                      | 4677.9±92.1                   | 0.995 | 2.3×10 <sup>-5</sup>                            | 4821.5±125.6                  | 0.907 |

**Table S8** Adsorption kinetic parameters of iodine vapor adsorption by **ZIF-90-I** at different temperatures

| Temperature<br>(°C) | $Q_{e, \text{exp}}$<br>(mg/g) | Pseudo-first-order          |                               |       | Pseudo-second-order                             |                               |       |
|---------------------|-------------------------------|-----------------------------|-------------------------------|-------|-------------------------------------------------|-------------------------------|-------|
|                     |                               | $k_1$<br>(h <sup>-1</sup> ) | $Q_{e, \text{cal}}$<br>(mg/g) | $R^2$ | $k_2$<br>(g·mg <sup>-1</sup> ·h <sup>-1</sup> ) | $Q_{e, \text{cal}}$<br>(mg/g) | $R^2$ |
| 40                  | 3749                          | 0.0101                      | 3813.4±113.3                  | 0.975 | 3.9×10 <sup>-6</sup>                            | 3824.6±78.6                   | 0.995 |
| 50                  | 3887                          | 0.0261                      | 3981.4±53.3                   | 0.992 | 6.2×10 <sup>-6</sup>                            | 3898.1±23.1                   | 0.998 |
| 60                  | 3974                          | 0.1002                      | 3849.9±109.1                  | 0.964 | 1.5×10 <sup>-5</sup>                            | 3850.2±104.7                  | 0.989 |
| 75                  | 5270                          | 0.1130                      | 5175.8±85.9                   | 0.984 | 2.4×10 <sup>-5</sup>                            | 5359.1±91.4                   | 0.994 |
| 90                  | 5380                          | 0.2539                      | 5389.7±100.1                  | 0.991 | 3.2×10 <sup>-5</sup>                            | 5341.1±87.9                   | 0.997 |

**Table S9** Adsorption kinetic parameters of iodine vapor adsorption by **ZIF-90-II** at different temperatures

| Temperature<br>(°C) | $Q_{e, \text{exp}}$<br>(mg/g) | Pseudo-first-order          |                               |       | Pseudo-second-order                             |                               |       |
|---------------------|-------------------------------|-----------------------------|-------------------------------|-------|-------------------------------------------------|-------------------------------|-------|
|                     |                               | $k_1$<br>(h <sup>-1</sup> ) | $Q_{e, \text{cal}}$<br>(mg/g) | $R^2$ | $k_2$<br>(g·mg <sup>-1</sup> ·h <sup>-1</sup> ) | $Q_{e, \text{cal}}$<br>(mg/g) | $R^2$ |
| 40                  | 4001                          | 0.0092                      | 4001.0±132.5                  | 0.974 | 5.0×10 <sup>-6</sup>                            | 4001.1±34.6                   | 0.995 |
| 50                  | 4260                          | 0.0292                      | 4324.4±45.1                   | 0.995 | 9.6×10 <sup>-6</sup>                            | 4316.9±38.6                   | 0.996 |
| 60                  | 4410                          | 0.0782                      | 4303.8±90.0                   | 0.985 | 1.8×10 <sup>-5</sup>                            | 4298.6±115.0                  | 0.991 |
| 75                  | 5680                          | 0.1350                      | 5465.7±79.1                   | 0.985 | 2.6×10 <sup>-5</sup>                            | 5788.0±81.1                   | 0.996 |
| 90                  | 5604                          | 0.2711                      | 5536.3±132.1                  | 0.985 | 3.5×10 <sup>-5</sup>                            | 5553.3±91.6                   | 0.997 |

**Table S10** Adsorption kinetic parameters of iodine vapor adsorption by **ZIF-90-III** at different temperatures

| Temperature (°C) | $Q_{e, \text{exp}}$ (mg/g) | Pseudo-first-order       |                            |       | Pseudo-second-order                          |                            |       |
|------------------|----------------------------|--------------------------|----------------------------|-------|----------------------------------------------|----------------------------|-------|
|                  |                            | $k_1$ (h <sup>-1</sup> ) | $Q_{e, \text{cal}}$ (mg/g) | $R^2$ | $k_2$ (g·mg <sup>-1</sup> ·h <sup>-1</sup> ) | $Q_{e, \text{cal}}$ (mg/g) | $R^2$ |
| 40               | 4300                       | 0.0113                   | 4321.8±91.4                | 0.985 | 5.6×10 <sup>-6</sup>                         | 4401.1±50.7                | 0.991 |
| 50               | 4634                       | 0.0374                   | 4635.1±23.6                | 0.998 | 1.2×10 <sup>-5</sup>                         | 4644.1±34.6                | 0.998 |
| 60               | 5210                       | 0.1070                   | 5175.3±160.6               | 0.951 | 1.9×10 <sup>-5</sup>                         | 5097.9±130.6               | 0.998 |
| 75               | 6600                       | 0.1360                   | 6325.2±89.1                | 0.986 | 2.3×10 <sup>-5</sup>                         | 6707.9±54.5                | 0.997 |
| 90               | 6342                       | 0.3068                   | 6219.5±111.4               | 0.990 | 3.8×10 <sup>-5</sup>                         | 6298.4±113.3               | 0.998 |

**Table S11** The iodine equilibrium amount (mg/g) of **ZIF-90** and **ZIF-90-I–ZIF-90-III** in iodine/cyclohexane solution with different concentrations

| $C_0$ (mg/L) × $V$ (mL) | <b>ZIF-90</b> | <b>ZIF-90-I</b> | <b>ZIF-90-II</b> | <b>ZIF-90-III</b> |
|-------------------------|---------------|-----------------|------------------|-------------------|
| 200 × 5                 | 150           | 182             | 192              | 196               |
| 300 × 5                 | 188           | 278             | 289              | 295               |
| 500 × 5                 | 264           | 466             | 484              | 493               |
| 600 × 5                 | 317           | 560             | 583              | 594               |
| 800 × 5                 | 342           | 757             | 776              | 792               |
| 500 × 15                | 483           | 928             | 1231             | 1419              |
| 700 × 15                | 510           | 989             | 1386             | 1633              |
| 1000 × 15               | 538           | 1005            | 1461             | 1826              |

**Table S12** Summary of iodine adsorption in MOFs via solution-based processes

| MOF                                                                                                                                              | Iodine uptake (g/g) | Ref.      |
|--------------------------------------------------------------------------------------------------------------------------------------------------|---------------------|-----------|
| IL@PCN-333(Al)                                                                                                                                   | 3.4                 | 1         |
| Ti <sub>16</sub> Pb <sub>5</sub> O <sub>16</sub> (C <sub>6</sub> H <sub>5</sub> CO <sub>2</sub> ) <sub>2</sub> (OCH <sub>3</sub> ) <sub>40</sub> | 3.1                 | 5         |
| Ag@MIL-101                                                                                                                                       | 2.14                | 22        |
| ZIF-90-III                                                                                                                                       | 1.826               | this work |
| ZIF-90-II                                                                                                                                        | 1.461               | this work |
| TMU-15                                                                                                                                           | 1.30                | 23        |
| TMU-16-NH <sub>2</sub>                                                                                                                           | 1.28                | 24        |
| AgNPs@UiO-66                                                                                                                                     | 1.26                | 25        |
| UIO-66                                                                                                                                           | 1.25                | 6         |

|                                                                                                                      |       |           |
|----------------------------------------------------------------------------------------------------------------------|-------|-----------|
| $[\text{WS}_4\text{Cu}_4(\mu\text{-CN})_2(\text{bpea})_2] \cdot 1.5\text{DMF}$                                       | 1.106 | 26        |
| $[\text{Cu}_8\text{I}_6(\text{CN})_2(\text{PPh}_3)_4]_n$                                                             | 1.104 | 27        |
| IFMC-15                                                                                                              | 1.10  | 28        |
| ZIF-90-I                                                                                                             | 1.005 | this work |
| $[\text{Cd}(\text{pbica})_2] \cdot 1.5\text{DMF} \cdot 2\text{CH}_3\text{OH}$                                        | 1.00  | 29        |
| BOF-1                                                                                                                | 0.93  | 30        |
| MBM                                                                                                                  | 0.88  | 31        |
| Ag-MSHC-6                                                                                                            | 0.77  | 32        |
| $[\text{Co}(\text{ebic})_2]_n$                                                                                       | 0.75  | 33        |
| $[\text{Zn}(\text{ebic})_2]_n$                                                                                       | 0.74  | 33        |
| $\text{Cu}(\text{H}_2\text{L}^5)$                                                                                    | 0.66  | 34        |
| AIOC-83                                                                                                              | 0.555 | 37        |
| ZIF-90                                                                                                               | 0.538 | this work |
| $[\text{Cu}_4\text{Cl}_3(\text{TPVS})_4(\text{H}_2\text{O})_2] \cdot \text{Cl}_5 \cdot \text{DMF} \cdot \text{MeOH}$ | 0.485 | 35        |
| Th-SINAP-8                                                                                                           | 0.473 | 36        |
| $[\text{Cu}^{\text{II}}(\text{btz})]_n$                                                                              | 0.47  | 38        |
| $[\text{Zn}_7(\text{L}^4)_3]_n[\text{Zn}_5(\text{L}^4)_3]_n$                                                         | 0.46  | 39        |
| Cu/MIL-101                                                                                                           | 0.432 | 2         |
| $\{[\text{Cu}_6(\text{pybz})_8(\text{OH})_2] \cdot \text{I}_5^- \cdot \text{I}_7^-\}_n$                              | 0.432 | 40        |
| HKUST-1@PES                                                                                                          | 0.376 | 21        |
| HKUST-1@PEI,                                                                                                         | 0.348 | 21        |
| SCNU-Z4                                                                                                              | 0.332 | 41        |
| MIL-101-NH <sub>2</sub> (Al)                                                                                         | 0.31  | 42        |
| JLU-Liu32                                                                                                            | 0.29  | 45        |
| $[\text{Cd}(2\text{-NH}_2\text{bdc})(4\text{-bpmh})]_n$                                                              | 0.28  | 43        |
| $[\text{Zn}_3(\text{L}^2)_2(\mu_2\text{-OH})_2]_n$                                                                   | 0.28  | 44        |
| $[\text{Zn}_3(\text{L}^3)_2(\mu_2\text{-OH})_2]_n$                                                                   | 0.26  | 44        |
| JLU-Liu31                                                                                                            | 0.25  | 45        |
| Ag <sub>2</sub> O-Ag <sub>2</sub> O <sub>3</sub> @ZIF-8                                                              | 0.23  | 46        |
| HKUST-1@PVDF                                                                                                         | 0.225 | 21        |
| TMU-16                                                                                                               | 0.22  | 24        |
| $[\text{Zn}_3(\text{BTC})_2(\text{TIB})_2]_n$                                                                        | 0.21  | 47        |
| $\{[\text{WS}_4\text{Cu}_4(4,4\text{-bpy})_4][\text{WS}_4\text{Cu}_4\text{I}_4(4,4\text{-bpy})_2]\}$                 | 0.20  | 48        |
| $[\text{Cd}(\text{L}^1)_2(\text{ClO}_4)_2]$                                                                          | 0.19  | 49        |
| MIL-53-NH <sub>2</sub> (Al)                                                                                          | 0.18  | 42        |
| Cu <sub>2</sub> TMBD                                                                                                 | 0.18  | 50        |
| JLU-Liu14                                                                                                            | 0.16  | 51        |
| $[\text{Cd}_3(\text{BTC})_2(\text{TIB})_2]_n$                                                                        | 0.16  | 47        |
| $[\text{Cd}(\text{bdc})(4\text{-bpmh})]_n$                                                                           | 0.15  | 43        |
| $[\text{DMA}][\text{In}(\text{TDC})_2]$                                                                              | 0.10  | 52        |
| $\{[\text{Zn}_2(\text{a-bptc})(\text{H}_2\text{O})_4] \cdot (\text{pra})\}_n$                                        | 0.085 | 53        |

**Table S13** Adsorption kinetic parameters of iodine adsorption by **ZIF-90** from iodine/cyclohexane solution with different concentrations

| $C_0$ (mg/L) ×<br>$V$ (mL) | $Q_{e, \text{exp}}$<br>(mg/g) | Pseudo-first-order          |                               |       | Pseudo-second-order                             |                               |       |
|----------------------------|-------------------------------|-----------------------------|-------------------------------|-------|-------------------------------------------------|-------------------------------|-------|
|                            |                               | $k_1$<br>(h <sup>-1</sup> ) | $Q_{e, \text{cal}}$<br>(mg/g) | $R^2$ | $k_2$<br>(g·mg <sup>-1</sup> ·h <sup>-1</sup> ) | $Q_{e, \text{cal}}$<br>(mg/g) | $R^2$ |
| 200 × 5                    | 150                           | 0.646                       | 141.4±4.9                     | 0.879 | 6.3×10 <sup>-3</sup>                            | 153.8±4.0                     | 0.996 |
| 300 × 5                    | 188                           | 0.3393                      | 183.0±5.3                     | 0.974 | 5.6×10 <sup>-3</sup>                            | 180.9±7.4                     | 0.991 |
| 500 × 5                    | 264                           | 0.6263                      | 259.5±5.4                     | 0.953 | 3.7×10 <sup>-3</sup>                            | 257.2±4.7                     | 0.991 |
| 600 × 5                    | 317                           | 0.3326                      | 310.2±8.1                     | 0.903 | 3.5×10 <sup>-3</sup>                            | 312.9±8.9                     | 0.997 |
| 800 × 5                    | 342                           | 0.813                       | 347.6±11.6                    | 0.921 | 3.7×10 <sup>-2</sup>                            | 342.2±3.3                     | 0.997 |
| 500 × 15                   | 483                           | 0.066                       | 493.1±8.1                     | 0.995 | 1.5×10 <sup>-3</sup>                            | 487.3±8.5                     | 0.997 |
| 700 × 15                   | 510                           | 0.074                       | 520.8±7.8                     | 0.992 | 1.2×10 <sup>-3</sup>                            | 516.5±10.8                    | 0.998 |
| 1000 × 15                  | 538                           | 0.302                       | 500.7±17.9                    | 0.696 | 3.6×10 <sup>-4</sup>                            | 549.4±7.5                     | 0.992 |

**Table S14** Adsorption kinetic parameters of iodine adsorption by **ZIF-90-I** from iodine/cyclohexane solution with different concentrations

| $C_0$ (mg/L) ×<br>$V$ (mL) | $Q_{e, \text{exp}}$<br>(mg/g) | Pseudo-first-order          |                               |       | Pseudo-second-order                             |                               |       |
|----------------------------|-------------------------------|-----------------------------|-------------------------------|-------|-------------------------------------------------|-------------------------------|-------|
|                            |                               | $k_1$<br>(h <sup>-1</sup> ) | $Q_{e, \text{cal}}$<br>(mg/g) | $R^2$ | $k_2$<br>(g·mg <sup>-1</sup> ·h <sup>-1</sup> ) | $Q_{e, \text{cal}}$<br>(mg/g) | $R^2$ |
| 200 × 5                    | 182                           | 0.378                       | 176.1±3.9                     | 0.972 | 2.2×10 <sup>-3</sup>                            | 183.9±3.6                     | 0.987 |
| 300 × 5                    | 278                           | 1.2602                      | 260.2±9.4                     | 0.877 | 3.5×10 <sup>-3</sup>                            | 272.7±5.1                     | 0.992 |
| 500 × 5                    | 466                           | 0.3039                      | 452.8±8.2                     | 0.982 | 1.8×10 <sup>-3</sup>                            | 447.2±13.9                    | 0.990 |
| 600 × 5                    | 560                           | 0.3554                      | 548.4±14.5                    | 0.958 | 1.8×10 <sup>-3</sup>                            | 546.6±16.5                    | 0.992 |
| 800 × 5                    | 757                           | 0.624                       | 735.6±17.3                    | 0.971 | 4.2×10 <sup>-2</sup>                            | 751.4±13.3                    | 0.994 |
| 500 × 15                   | 928                           | 0.087                       | 922.3±21.3                    | 0.983 | 1.3×10 <sup>-3</sup>                            | 936.8±10.8                    | 0.999 |
| 700 × 15                   | 989                           | 0.087                       | 997.2±21.7                    | 0.982 | 8.3×10 <sup>-4</sup>                            | 993.5±11.2                    | 0.997 |
| 1000 × 15                  | 1005                          | 0.0975                      | 985.0±16.8                    | 0.984 | 8.1×10 <sup>-4</sup>                            | 1034.3±31.7                   | 0.993 |

**Table S15** Adsorption kinetic parameters of iodine adsorption by **ZIF-90-II** from iodine/cyclohexane solution with different concentrations

| $C_0$ (mg/L) ×<br>$V$ (mL) | $Q_{e, \text{exp}}$<br>(mg/g) | Pseudo-first-order          |                               |       | Pseudo-second-order                             |                               |       |
|----------------------------|-------------------------------|-----------------------------|-------------------------------|-------|-------------------------------------------------|-------------------------------|-------|
|                            |                               | $k_1$<br>(h <sup>-1</sup> ) | $Q_{e, \text{cal}}$<br>(mg/g) | $R^2$ | $k_2$<br>(g·mg <sup>-1</sup> ·h <sup>-1</sup> ) | $Q_{e, \text{cal}}$<br>(mg/g) | $R^2$ |
| 200 × 5                    | 192                           | 0.486                       | 184.2±4.5                     | 0.956 | 2.8×10 <sup>-3</sup>                            | 195.9±3.8                     | 0.993 |
| 300 × 5                    | 289                           | 0.9815                      | 280.2±8.9                     | 0.921 | 3.1×10 <sup>-3</sup>                            | 281.9±6.1                     | 0.992 |
| 500 × 5                    | 484                           | 0.3752                      | 473.6±6.7                     | 0.987 | 2.2×10 <sup>-3</sup>                            | 482.2±12.2                    | 0.991 |
| 600 × 5                    | 583                           | 0.6449                      | 567.3±12.1                    | 0.826 | 1.7×10 <sup>-3</sup>                            | 574.5±13.9                    | 0.993 |
| 800 × 5                    | 776                           | 0.773                       | 749.2±18.1                    | 0.966 | 3.5×10 <sup>-2</sup>                            | 763.7±15.6                    | 0.996 |
| 500 × 15                   | 1231                          | 0.108                       | 1208.3±20.4                   | 0.977 | 1.1×10 <sup>-3</sup>                            | 1241.2±13.8                   | 0.999 |
| 700 × 15                   | 1386                          | 0.105                       | 1380.4±12.8                   | 0.993 | 6.2×10 <sup>-4</sup>                            | 1379.3±19.8                   | 0.998 |
| 1000 × 15                  | 1461                          | 0.208                       | 1381.3±31.2                   | 0.905 | 2.0×10 <sup>-4</sup>                            | 1492.8±14.3                   | 0.995 |

**Table S16** Adsorption kinetic parameters of iodine adsorption by **ZIF-90-III** from iodine/cyclohexane solution with different concentrations

| $C_0$ (mg/L) ×<br>$V$ (mL) | $Q_{e, \text{exp}}$<br>(mg/g) | Pseudo-first-order          |                               |       | Pseudo-second-order                             |                               |       |
|----------------------------|-------------------------------|-----------------------------|-------------------------------|-------|-------------------------------------------------|-------------------------------|-------|
|                            |                               | $k_1$<br>(h <sup>-1</sup> ) | $Q_{e, \text{cal}}$<br>(mg/g) | $R^2$ | $k_2$<br>(g·mg <sup>-1</sup> ·h <sup>-1</sup> ) | $Q_{e, \text{cal}}$<br>(mg/g) | $R^2$ |
| 200 × 5                    | 196                           | 0.683                       | 193.8±2.4                     | 0.986 | 4.3×10 <sup>-3</sup>                            | 202.2±3.3                     | 0.997 |
| 300 × 5                    | 295                           | 1.7689                      | 289.1±5.7                     | 0.955 | 3.4×10 <sup>-3</sup>                            | 291.4±3.2                     | 0.997 |
| 500 × 5                    | 493                           | 0.5729                      | 484.4±5.4                     | 0.988 | 2.0×10 <sup>-3</sup>                            | 508.9±3.3                     | 0.999 |
| 600 × 5                    | 594                           | 0.8014                      | 578.9±13.2                    | 0.857 | 1.8×10 <sup>-3</sup>                            | 579.7±10.7                    | 0.996 |
| 800 × 5                    | 792                           | 1.122                       | 758.7±17.2                    | 0.966 | 1.5×10 <sup>-2</sup>                            | 782.5±19.8                    | 0.998 |
| 500 × 15                   | 1419                          | 0.131                       | 1399.6±30.3                   | 0.952 | 1.2×10 <sup>-3</sup>                            | 1429.3±15.4                   | 0.999 |
| 700 × 15                   | 1633                          | 0.114                       | 1619.0±18.3                   | 0.991 | 5.3×10 <sup>-4</sup>                            | 1646.8±21.5                   | 0.999 |
| 1000 × 15                  | 1826                          | 0.197                       | 1743.6±36.5                   | 0.919 | 1.5×10 <sup>-4</sup>                            | 1835.8±21.9                   | 0.996 |

**Table S17** Summary of the related parameters obtained via Langmuir and Freundlich isotherm models for iodine adsorption from iodine/cyclohexane solution by **ZIF-90** and **ZIF-90-I–ZIF-90-III**.

| Compounds         | Langmuir isotherm model |                   |       | Freundlich isotherm model |       |       |
|-------------------|-------------------------|-------------------|-------|---------------------------|-------|-------|
|                   | $K_L$ (L/mg)            | $Q_{\max}$ (mg/g) | $R^2$ | $K_F$ (mg/g)              | $1/n$ | $R^2$ |
| <b>ZIF-90</b>     | 235.1                   | 569.2             | 0.982 | 45.9                      | 0.32  | 0.971 |
| <b>ZIF-90-I</b>   | 41.1                    | 1036.4            | 0.960 | 131.7                     | 0.27  | 0.868 |
| <b>ZIF-90-II</b>  | 32.4                    | 1444.2            | 0.951 | 238.6                     | 0.26  | 0.912 |
| <b>ZIF-90-III</b> | 22.8                    | 1795.4            | 0.959 | 666.3                     | 0.15  | 0.889 |

**Table S18** Calculated transferred charges (CT) from clusters to iodine molecules and corresponding binding energies ( $\Delta E$ ).

| Compounds          | CT ( $e$ ) | $\Delta E$ (eV) |
|--------------------|------------|-----------------|
| <b>ZIF-90</b>      | -0.172     | -0.664          |
| <b>ZIF-90-mono</b> | -0.183     | -0.687          |
| <b>ZIF-90-bis</b>  | -0.134     | -0.574          |

## References

1. Tang, Y.; Huang, H.; Li, J.; Xue, W.; Zhong, C. IL-induced formation of dynamic complex iodide anions in IL@MOF composites for efficient iodine capture. *J. Mater. Chem. A*, **2019**, *7*, 18324–18329.
2. Qi, B.; Liu, Y.; Zheng, T.; Gao, Q.; Yan, X.; Jiao, Y. and Yang, Y. Highly efficient capture of iodine by Cu/MIL-101. *J. Solid State Chem.*, **2018**, *258*, 49–55.
3. Guo, B.; Li, F.; Wang, C.; Zhang, L. and Sun, D. A rare (3,12)-connected zirconium metal–organic framework with efficient iodine adsorption capacity and pH sensing. *J. Mater. Chem. A*, **2019**, *7*, 13173–13179.
4. Marshall, R. J.; Griffin, S. L.; Wilson, C. and Forgan, R. S. Stereoselective halogenation of integral unsaturated C-C bonds in chemically and mechanically robust Zr and Hf MOFs. *Chem. Eur. J.*, **2016**, *22*, 4870–4877.



5. Said, A.; Gao, C.; Liu, C.; Niu, H.; Wang, D.; Liu, Y.; Du, L.; Tung, C. H.; Wang, Y. A mesoporous lead-doped titanium oxide compound with high performance and recyclability in I<sub>2</sub> uptake and photocatalysis. *Inorg. Chem.*, **2022**, *61*, 586–596.
6. Chen, P.; He, X.; Pang, M.; Dong, X.; Zhao, S.; Zhang, W. Iodine capture using Zr-based metal–organic frameworks (Zr-MOFs): adsorption performance and mechanism. *ACS Appl. Mater. Interfaces*, **2020**, *12*, 20429–20439.
7. Yao, R. X.; Cui, X.; Jia, X. X.; Zhang, F. Q. and Zhang, X. M. A luminescent Zinc(II) metal–organic framework (MOF) with conjugated  $\pi$ -electron ligand for high iodine capture and nitro-explosive detection. *Inorg. Chem.*, **2016**, *55*, 9270–9275.
8. Ohtsu, H.; Kim, J.; Kanamaru, T.; Inoue, D.; Hashizume, D.; Kawano, M. Stepwise observation of iodine diffusion in a flexible coordination network having dual interactive sites. *Inorg. Chem.*, **2021**, *60*, 13727–13735.
9. Sava, D. F.; Chapman, K. W.; Rodriguez, M. A.; Greathouse, J. A.; Crozier, P. S.; Zhao, H.; Chupas P. J. and Nenoff, T. M. Competitive I<sub>2</sub> sorption by Cu-BTC from humid gas streams. *Chem. Mater.*, **2013**, *25*, 2591–2596.
10. Brunet, G.; Safin, D. A.; Aghaji, M. Z.; Robeyns, K.; Korobkov, I.; Woo, T. K. and Murugesu, M. Stepwise crystallographic visualization of dynamic guest binding in a nanoporous framework. *Chem. Sci.*, **2017**, *8*, 3171–3177.
11. Zhang, X.; Silva, I. Da; Godfrey, H. G. W.; Callear, S. K.; Sapchenko, S. A.; Cheng, Y.; Vitorica-Yrezabal, I.; Frogley, M. D.; Cinque, G.; Tang, C. C.; Giacobbe, C.; Dejoie, C.; Rudić, S.; Ramirez-Cuesta, A. J.; Denecke, M. A.; Yang, S. and Schröder, M. Confinement of iodine molecules into triple-helical chains within robust metal–organic frameworks. *J. Am. Chem. Soc.*, **2017**, *139*, 16289–16296.
12. Wang, L.; Chen, P.; Dong, X.; Zhang, W.; Zhao, S.; Xiao, S.; Ouyang, Y. Porous MOF-808@PVDF beads for removal of iodine from gas streams. *RSC Adv.*, **2020**, *10*, 44679–44687.
13. Hughes, J. T.; Sava, D. F.; Nenoff, T. M. and Navrotsky, A.; Thermochemical evidence for strong iodine chemisorption by ZIF-8. *J. Am. Chem. Soc.* **2013**, *135*, 16256–16259.

14. Li, Z. J.; Guo, S.; Lu, H.; Xu, Y.; Yue, Z.; Weng, L.; Guo, X.; Lin, J.; Wang, J.-Q. Unexpected structural complexity of thorium coordination polymers and polyoxo cluster built from simple formate ligands. *Inorg. Chem. Front.*, **2020**, *7*, 260–269.
15. Leloire, M.; Walshe, C.; Devaux, P.; Giovine, R.; Duval, S.; Bousquet, T.; Chibani, S.; Paul, J. F.; Moissette, A.; Vezin, H.; Nerisson, P.; Cantrel, L.; Volkringer, C.; Loiseau, T. Capture of gaseous iodine in isorecticular Zirconium-based UiO-n metal-organic frameworks: influence of amino functionalization, DFT calculations, Raman and EPR spectroscopic investigation. *Chem. Eur. J.*, **2022**, *28*, e202104437–e202104453.
16. Wang, X.; Zhang, H.; Qi, C.; Zhou, F.; Ni, L.; Chen, S.; Qi, J.; Wang, C.; Zheng, T.; Li, J. Hydrangea-like architectures composed of Zr-based metal-organic framework nanosheets with enhanced iodine capture. *Dalton Trans.*, **2021**, *50*, 16468–16472.
17. Wang, L.; Li, T.; Dong, X.; Pang, M.; Xiao, S.; Zhang, W. Thiophene-based MOFs for iodine capture: effect of pore structures and interaction mechanism. *Chem. Eng. J.*, **2021**, *425*, 130578–130586.
18. Wu, K.; Huang, Y. L.; Zheng, J.; Luo, D.; Xie, M.; Li, Y. Y.; Lu, W.; Li, D. A microporous shp-topology metal-organic framework with an unprecedented high-nuclearity Co<sub>10</sub>-cluster for iodine capture and histidine detection. *Mater. Chem. Front.* **2021**, *5*, 4300–4309.
19. Luo, D.; Wang, F.; Liu, C.-H.; Wang, S.-T.; Sun, Y. Y.; Fang, W. H.; Zhang, J. Combination of aluminum molecular rings with chemical reduction centers for iodine capture and aggregation. *Inorg. Chem. Front.*, **2022**, *9*, 4506–4516.
20. Banerjee, D.; Chen, X.; Lobanov, S. S.; Plonka, A. M.; Chan, X.; Daly, J. A.; Kim, T.; Thallapally, P. K. and Parise, J. B. Iodine adsorption in metal organic frameworks in the presence of humidity. *ACS Appl. Mater. Interfaces*, **2018**, *10*, 10622–10626.
21. Valizadeh, B.; Nguyen, T. N.; Smit, B. and Stylianou, K. C. Porous metal-organic framework@polymer beads for iodine capture and recovery using a gas-sparged column. *Adv. Funct. Mater.*, **2018**, *28*, 1801596–1801601.

22. Mao, P.; Qi, B.; Liu, Y.; Zhao, L.; Jiao, Y.; Zhang, Y.; Jiang, Z.; Li, Q.; Wang, J.; Chen, S. and Yang, Y. Ag<sup>II</sup> doped MIL-101 and its adsorption of iodine with high speed in solution. *J. Solid State Chem.*, **2016**, *237*, 274–283.
23. Hashemi, L. and Morsali, A. A new lead(II) nanoporous three-dimensional coordination polymer: pore size effect on iodine adsorption affinity. *CrystEngComm*, **2014**, *16*, 4955–4958.
24. Safarifard, V. and Morsali, A. Influence of an amine group on the highly efficient reversible adsorption of iodine in two novel isorecticular interpenetrated pillared-layer microporous metal–organic frameworks. *CrystEngComm*, **2014**, *16*, 8660–8663.
25. Feng, Y.; Yang, P.; Li, Y. and Gu, J. J. AgNPs-containing metal–organic frameworks for the effective adsorption and immobilization of radioactive iodine. *Chem. Eng. Data*, **2020**, *65*, 1986–1992.
26. Liu, M. D.; Abrahams, B. F.; Ren, Z. G.; Lang, J. P. A 3D [WS<sub>4</sub>Cu<sub>4</sub>]<sup>2+</sup> cluster-based material with high iodine uptake capability. *Dalton Trans.* **2019**, *48*, 6695–6699.
27. Zheng, H. W.; Yang, D.-D.; Liang, Q.-F.; Liu, Y.-P.; Shan, J.-H.; Liu, Q.-Q.; Tan, H.-W.; Chen, L.; Zheng, X.-J. A diamond-like cuprous coordination polymer based on the [Cu<sub>8</sub>I<sub>6</sub>]<sup>2+</sup> cluster with multistimuli-responsive luminescence and iodine adsorption behavior. *J. Mater. Chem. C.*, **2022**, *10*, 3901–3907.
28. He, W. W.; Li, S. L.; Yang, G. S.; Lan, Y. Q.; Su, Z. M. and Fu, Q. Controllable synthesis of a non-interpenetrating microporous metal–organic framework based on octahedral cage-like building units for highly efficient reversible adsorption of iodine. *Chem. Commun.*, **2012**, *48*, 10001–10003.
29. Shi, B. B.; Pei, R. Z.; Chen, A. W.; Wang, C.; Ma, Y. M. and Yin, Z. A rigid and porous metal-organic frameworks with 1D rhombus channels and double walls: Selective adsorption of CO<sub>2</sub> over N<sub>2</sub>, iodine capture, and fluorescence. *Inorg. Chem. Commun.*, **2019**, *102*, 147–151.
30. Choi, H. J. and Suh, M. P. Dynamic and redox active pillared bilayer open framework: single-crystal-to-single-crystal transformations upon guest removal, guest exchange, and framework oxidation. *J. Am. Chem. Soc.*, **2004**, *126*, 15844–15851.

31. He, T.; Xu, X.; Ni, B.; Lin, H.; Li, C.; Hu, W. and Wang, X. Metal–organic framework based microcapsules. *Angew. Chem. Int. Ed.*, **2018**, *57*, 10148–10152.
32. Li, H.; Li, Y.; Li, B.; Liu, D. and Zhou, Y. Highly selective anchoring silver nanoclusters on MOF/SOF heterostructured framework for efficient adsorption of radioactive iodine from aqueous solution. *Chemosphere*, **2020**, *252*, 126448–126459.
33. Yu, F.; Li, D. D.; Cheng, L.; Yin, Z.; Zeng, M. H. and Kurmoo, M. Porous supramolecular networks constructed of one-dimensional metal–organic chains: carbon dioxide and iodine capture. *Inorg. Chem.*, **2015**, *54*, 1655–1660.
34. Zhang, H. M.; Wu, H.; Liu, Y. Y.; Yang, J.; Kang, D. W. and Ma, J. F. Syntheses, structures, gas adsorption and reversible iodine adsorption of two porous Cu(II) MOFs. *CrystEngComm*, **2015**, *17*, 1583–1590.
35. Deshmukh, M. S.; Chaudhary, A.; Zolotarev, P. N.; Boomishankar, R. A 3D coordination network built from  $\text{Cu}^{\text{II}}_4\text{Cl}_3(\text{H}_2\text{O})_2$  linear clusters and tetrapyridyl tetrahedral silane ligands: reversible iodine uptake and friedel–crafts alkylation reactions. *Inorg. Chem.*, **2017**, *56*, 11762–11767.
36. Li, Z. J.; Yue, Z.; Ju, Y.; Wu, X.; Ren, Y.; Wang, S.; Li, Y.; Zhang, Z. H.; Guo, X.; Lin, J.; Wang, J. Q. Ultrastable thorium metal–organic frameworks for efficient iodine adsorption. *Inorg. Chem.*, **2020**, *59*, 4435–4442.
37. Liu, C. H.; Fang, W. H.; Sun, Y.; Yao, S.; Wang, S. T.; Lu, D.; Zhang, J. Designable assembly of aluminum molecular rings for sequential confinement of iodine molecules. *Angew. Chem. Int. Ed.*, **2021**, *60*, 21426–21433.
38. Cui, P.; Ren, L.; Chen, Z.; Hu, H.; Zhao, B.; Shi, W. and Cheng, P. Temperature-controlled chiral and achiral copper tetrazolate metal–organic frameworks: syntheses, structures, and  $\text{I}_2$  adsorption. *Inorg. Chem.*, **2012**, *51*, 2303–2310.
39. Zhang, Z. J.; Shi, W.; Niu, Z.; Li, H. H.; Zhao, B.; Cheng, P.; Liao, D. Z. and Yan, S. P. A new type of polyhedron-based metal–organic frameworks with interpenetrating cationic and anionic nets demonstrating ion exchange, adsorption and luminescent properties. *Chem. Commun.*, **2011**, *47*, 6425–6427.

40. Yin, Z.; Wang, Q. X.; Zeng, M. H. Iodine release and recovery, influence of polyiodide anions on electrical conductivity and nonlinear optical activity in an interdigitated and interpenetrated bipillared-bilayer metal–organic framework. *J. Am. Chem. Soc.*, **2012**, *134*, 4857–4863.
41. Wang, G. Q.; Huang, J. F.; Huang, X. F.; Deng, S. Q.; Zheng, S. R.; Cai, S. L.; Fan, J.; Zhang, W.-G. A hydrolytically stable cage-based metal–organic framework containing two types of building blocks for the adsorption of iodine and dyes. *Inorg. Chem. Front.*, **2021**, *8*, 1083–1092.
42. Falaise, C.; Volkringer, C.; Facqueur, J.; Bousquet, T.; Gasnot, L. and Loiseau, T. Capture of iodine in highly stable metal–organic frameworks: a systematic study. *Chem. Commun.*, **2013**, *49*, 10320–10322.
43. Parshamoni, S.; Sanda, S.; Jena, H. S.; Konar, S. Tuning CO<sub>2</sub> uptake and reversible iodine adsorption in two isorecticular mofs through ligand functionalization. *Chem. Asian J.*, **2015**, *10*, 653–660.
44. Sun, F.; Yin, Z.; Wang, Q. Q.; Sun, D.; Zeng, M. H. and Kurmoo, M. Tandem postsynthetic modification of a metal–organic framework by thermal elimination and subsequent bromination: effects on absorption properties and photoluminescence. *Angew. Chem. Int. Ed.*, **2013**, *52*, 4538–4543.
45. Yao, S.; Sun, X.; Liu, B.; Krishna, R.; Li, G.; Huo, Q. and Liu, Y. Two heterovalent copper–organic frameworks with multiple secondary building units: high performance for gas adsorption and separation and I<sub>2</sub> sorption and release. *J. Mater. Chem. A*, **2016**, *4*, 15081–15087.
46. Gao, Q.; Liu, Y.; Jiao, Y.; Yang, Y.; Zhang, X.; Wang, P.; Chen, J.; Gao, Q.; Zhang, X.; Liu, Y.; Wang, P.; Jiao, Y. and Yang, Y. Nanometer mixed-valence silver oxide enhancing adsorption of ZIF-8 for removal of iodide in solution. *Sci. Total Environ.*, **2018**, *646*, 634–644.
47. Rachuri, Y.; Bisht, K. K.; Parmar, B.; Suresh, E. Luminescent MOFs comprising mixed tritopic linkers and Cd(II)/Zn(II) nodes for selective detection of organic nitro compounds and iodine capture. *J. Solid State Chem.*, **2015**, *223*, 23–31.

48. Lang, J. P.; Xu, Q. F.; Yuan, R. X. and Abrahams, B. F. {[WS<sub>4</sub>Cu<sub>4</sub>(4,4'-bpy)<sub>4</sub>][WS<sub>4</sub>Cu<sub>4</sub>I<sub>4</sub>(4,4'-bpy)<sub>2</sub>]}<sub>∞</sub>—An unusual 3d porous coordination polymer formed from the preformed cluster [Et<sub>4</sub>N]<sub>4</sub>[WS<sub>4</sub>Cu<sub>4</sub>I<sub>6</sub>]. *Angew.Chem. Int. Ed.*, **2004**, *43*, 4741–4745.
49. Liu, Q. K.; Ma, J. P. and Dong, Y. B. Highly efficient iodine species enriching and guest-driven tunable luminescent properties based on a cadmium(II)-triazole MOF. *Chem. Commun.*, **2011**, *47*, 7185–7187.
50. Liu, J.; Xiao, R.; Wong, Y. L.; Zhou, X. P.; Zeller, M.; Hunter, A. D.; Fang, Q.; Liao, L. and Xu, Z. Made in water: a stable microporous Cu(I)-carboxylate framework (CityU-7) for CO<sub>2</sub>, water, and iodine uptake. *Inorg. Chem.*, **2018**, *57*, 4807–4811.
51. Wang, J.; Luo, J.; Luo, X.; Zhao, J.; Li, D. S.; Li, G.; Huo, Q. and Liu, Y. Assembly of a three-dimensional metal–organic framework with copper(i) iodide and 4-(pyrimidin-5-yl) benzoic acid: controlled uptake and release of iodine. *Cryst. Growth Des.*, **2015**, *15*, 915–920.
52. Mani, P.; Mandal, N.; Roopesh, M.; Gopalakrishnan, H.; Datta, A. and Mandal, S. Enhancement in electrical conductivity of a porous indium based metal–organic framework upon I<sub>2</sub> uptake: combined experimental and theoretical investigations. *J. Mater. Chem. C*, **2020**, *8*, 4836–4842.
53. Feng, S. S.; Bai, Y. T.; Zhu, J. L.; Lu, L. P. and Zhu, M. L. Irreversible solvent-assisted structural transformation in 3D metal-organic frameworks: Structural modification and enhanced iodine-adsorption properties. *Spectrochim. Acta, Part A*, **2018**, *205*, 139–145.
